1 **Title:**

2

3 Rolling Circle RNA Synthesis Catalysed by RNA

4

5

6

7

8

9

10 **Authors:**

11

12 Emil Laust Kristoffersen<sup>1,3</sup>, Matthew Burman<sup>2</sup>, Agnes Noy<sup>2</sup> & Philipp Holliger<sup>1\*</sup>

13

14

15

16

17

18 **Affiliations:**

19 <sup>1</sup>MRC Laboratory of Molecular Biology, Cambridge Biomedical Campus, Francis Crick

20 Avenue, Cambridge CB2 0QH, UK, <sup>2</sup>Department of Physics, University of York, Heslington

21 York, YO10 5DD, UK

22

23 Current address: <sup>3</sup>Interdisciplinary Nanoscience Center (iNANO), Aarhus University, Aarhus,

24 Denmark.

25

26

27

28 \*Correspondence to: [ph1@mrc-lmb.cam.ac.uk](mailto:ph1@mrc-lmb.cam.ac.uk)

29 **Abstract**

30 RNA-catalysed RNA replication is widely considered a key step in the emergence of life's first  
31 genetic system. However, RNA replication can be impeded by the extraordinary stability of  
32 duplex RNA products, which must be dissociated for re-initiation of the next replication cycle.  
33 Here we have explored rolling circle synthesis (RCS) as a potential solution to this strand  
34 separation problem. RCS on small circular RNAs - as indicated by molecular dynamics  
35 simulations - induces a progressive build-up of conformational strain with destabilisation of  
36 nascent strand 5' and 3' ends. At the same time, we observe sustained RCS by a triplet  
37 polymerase ribozyme on small circular RNAs over multiple orbits with strand displacement  
38 yielding concatemeric RNA products. Furthermore, we show RCS of a circular Hammerhead  
39 ribozyme capable of self-cleavage and re-circularisation. Thus, all steps of a viroid-like RNA  
40 replication pathway can be catalysed by RNA alone. Our results have implications for the  
41 emergence of RNA replication and for understanding the potential of RNA to support complex  
42 genetic processes.

43

44

45

46

47 **Key words:** origin of life, rolling circle, rolling circle synthesis, circular RNA, circular nucleic  
48 acids, ribozymes, hammerhead, persistence length, RNA molecular dynamics simulation.

## 49 **Introduction**

50 The versatility of RNA functions underpins hypotheses regarding the origin and early evolution  
51 of life. Such hypotheses of an “RNA world” – a primordial biology centred on RNA as the main  
52 biomolecule - are in accord with the essential role of RNA catalysis in present day biology  
53 (Cech, 2000; Goldman and Kacar, 2021; Nissen et al., 2000; Wilkinson et al., 2020) and the  
54 discovery of multiple prebiotic synthetic pathways to several of the RNA (and DNA)  
55 nucleotides (Becker et al., 2019; Kim et al., 2020; Patel et al., 2015; Powner et al., 2009; Xu  
56 et al., 2020). In addition, progress in both non-enzymatic (Deguzman et al., 2014; Hassenkam  
57 et al., 2020; Prywes et al., 2016; Rajamani et al., 2008; Wachowius and Holliger, 2019; Zhang  
58 et al., 2020; Zhou et al., 2020) and RNA-catalysed polymerization of RNA and some of its  
59 analogues (Attwater et al., 2018, 2013; Cojocar and Unrau, 2021; Ekland and Bartel, 1996;  
60 Horning and Joyce, 2016; Johnston et al., 2001; Mutschler et al., 2018; Shechner et al., 2009;  
61 Tagami et al., 2017; Tjhung et al., 2020) is beginning to map out a plausible path to RNA self-  
62 replication; a cornerstone of the RNA world hypothesis.

63

64 RNA *in vitro* evolution and engineering have led to the discovery of RNA polymerase  
65 ribozymes (RPRs) able perform templated RNA synthesis of up to ~200 nucleotides (nt)  
66 (Attwater et al., 2018), synthesizing active ribozymes including the catalytic class I ligase core  
67 (Horning and Joyce, 2016; Tjhung et al., 2020) at the heart of the most efficient RPRs, as well  
68 as initiate processive RNA synthesis using a mechanism with analogies to sigma-dependent  
69 transcription initiation (Cojocar and Unrau, 2021). A RPR capable of utilizing trinucleotide  
70 triphosphates (triplets) as substrates (a triplet polymerase ribozyme (TPR)) has been shown  
71 to display a much enhanced capacity to copy highly structured RNA templates including  
72 segments of its own sequence (Attwater et al., 2018).

73

74 Nevertheless, there remain a number of fundamental obstacles to be overcome before an  
75 autonomous self-replication system can be established. A central problem among these is the  
76 so called “strand inhibition problem”, a form of product inhibition due to the accumulation of  
77 highly stable dead-end RNA duplexes, which cannot be dissociated (efficiently) under  
78 replication conditions (Le Vay and Mutschler, 2019). The strand inhibition problem has been  
79 overcome by (PCR-like) thermocycling (or thermophoresis) (Horning and Joyce, 2016; Salditt  
80 et al., 2020) but this approach may be limited to short RNA oligomers (even in the presence  
81 of high concentrations of denaturing agents) as the melting temperatures of longer RNA  
82 duplexes approach or even exceed the boiling point of water (Freier et al., 1986; Szostak,  
83 2012).

84

85 While RNA duplexes occur by necessity as intermediates of RNA replication, the extent of the  
86 strand inhibition problem can be modulated by genome topology. Circular rather than linear  
87 genomes are widespread in biology including eukaryotes, prokaryotes and viruses (Møller et  
88 al., 2018; Moss et al., 2020; Shulman and Davidson, 2017). Circular RNAs (circRNAs) are  
89 found as products of RNA splicing (Kristensen et al., 2019) and RNA-based self-circularization  
90 is known in multiple ribozymes (Hieronymus and Müller, 2019; Lasda and Parker, 2014;  
91 Petkovic and Müller, 2015). Templated RNA synthesis on circular templates (Rolling Circle  
92 Synthesis (RCS)) is also widespread and found in the replication of the RNA genomes in some  
93 viruses and in viroids. Indeed, viroid RNA replication has been proposed to resemble an  
94 ancient mechanisms for replication (Diener, 1989; Flores et al., 2014). RCS has potentially  
95 unique properties with regards to the strand inhibition problem where RNA duplex melting in  
96 principle can be effected by continuous toehold strand displacement driven by nucleotide  
97 hybridization and the ratchet of nascent strand extension by triphosphate hydrolysis. In an  
98 idealized RCS mechanism, such strand invasion and displacement processes are both  
99 isoenergetic and coordinated to nascent strand extension (Blanco et al., 1989; Daubendiek et  
100 al., 1995), with rotation of the single-stranded RNA (ssRNA) preventing the build-up of  
101 topological tension (Kuhn et al., 2002). Thus RCS is a potentially open-ended process leading  
102 to the synthesis of single-stranded multiple repeat products (concatemers) with an internally  
103 energized strand displacement circumventing the “strand inhibition problem” (Tupper and  
104 Higgs, 2021).

105  
106 Here we have explored RCS of small circular RNA (scRNA) templates as a potential solution  
107 to the strand inhibition problem in RNA-catalysed RNA replication. We show that RCS can be  
108 catalysed by a TPR, which is able to perform continuous templated extension of circular RNA  
109 templates for multiple cycles yielding concatemeric repeat products. We also explore the  
110 mechanistic basis for RCS and strand displacement by molecular dynamics (MD) simulations  
111 of scRNA in explicit solvent. Finally, we explore the potential of a full viroid-like replication  
112 cycle catalysed by RNA by design and synthesis of a circular Hammerhead ribozyme capable  
113 of both product cleavage and self-circularization.

114 **Results**

115 **RNA-catalysed primer extension using small circular RNA templates.**

116 We first set out to investigate whether templated RNA synthesis on scRNAs could be  
117 catalysed by an RNA catalyst. To extend beyond the full circle and initiate RCS requires duplex  
118 invasion and displacement of the original RNA product strand. However, most RPRs are  
119 inhibited by duplex RNA both in the form of template secondary structures and as linear duplex  
120 RNA. We therefore explored the potential of a recently described TPR (Attwater et al., 2018),  
121 which is able to utilize triphosphorylated trinucleotides (triplets (<sup>ppp</sup>NNN)) as substrates for  
122 polymerization. Due to increased binding of the triplets to the template (compared e.g. to the  
123 canonical mononucleotide triphosphates (NTPs)), triplets are able to invade and cooperatively  
124 “open up” template secondary structures for replication (Attwater et al., 2018). We  
125 hypothesized that this ability might also promote the continuous invasion of the opposing  
126 strand and facilitate the RCS mechanism (Figure 1A). Similar to what was described  
127 previously, RNA synthesis by the TPR best in the eutectic phase of water ice, due to beneficial  
128 reaction conditions for ribozyme catalysis such as reduced RNA hydrolysis and high ionic and  
129 RNA substrate concentrations (Attwater et al., 2010). This was also the case on scRNA  
130 templates.

131

132 We prepared scRNA templates (34-58 nt in length) by *in vitro* transcription and ligation and  
133 confirmed circularity by resistance to exonuclease degradation in contrast to the linear, non-  
134 ligated counterparts (Figure 1B, Figure 1 - Figure supplement 1, see sequences for all  
135 oligonucleotides in Supplementary file 1). On these, we first investigated primer extensions  
136 using just a single triplet (<sup>ppp</sup>GAA) as this provides an even banding pattern of incorporation  
137 facilitating analysis allowing primer extension efficiencies of linear and circular templates to  
138 be more readily compared (Figure 1C). Primer extension experiments using a purified 36 nt  
139 scRNA as template resulted in full-length extension around the circle (Figure 1D), but with  
140 reduced efficiency compared to a linear RNA template. Furthermore, we observed a periodic  
141 pattern of extension efficiency for the triplet junctions in agreement with the helical pitch of  
142 double-stranded RNA (dsRNA) (11.3 base pairs (bp)/turn (Bhattacharyya et al., 1990)) (Figure  
143 1E). Presumably, triplet junctions located on the inside of the scRNA ring are less well  
144 accessible and therefore less efficiently ligated than in linear RNA, which is freely accessible  
145 from all sides (Figure 1F). In turn, this leads to the observed periodicity and reduced synthetic  
146 efficiency on scRNAs.

147

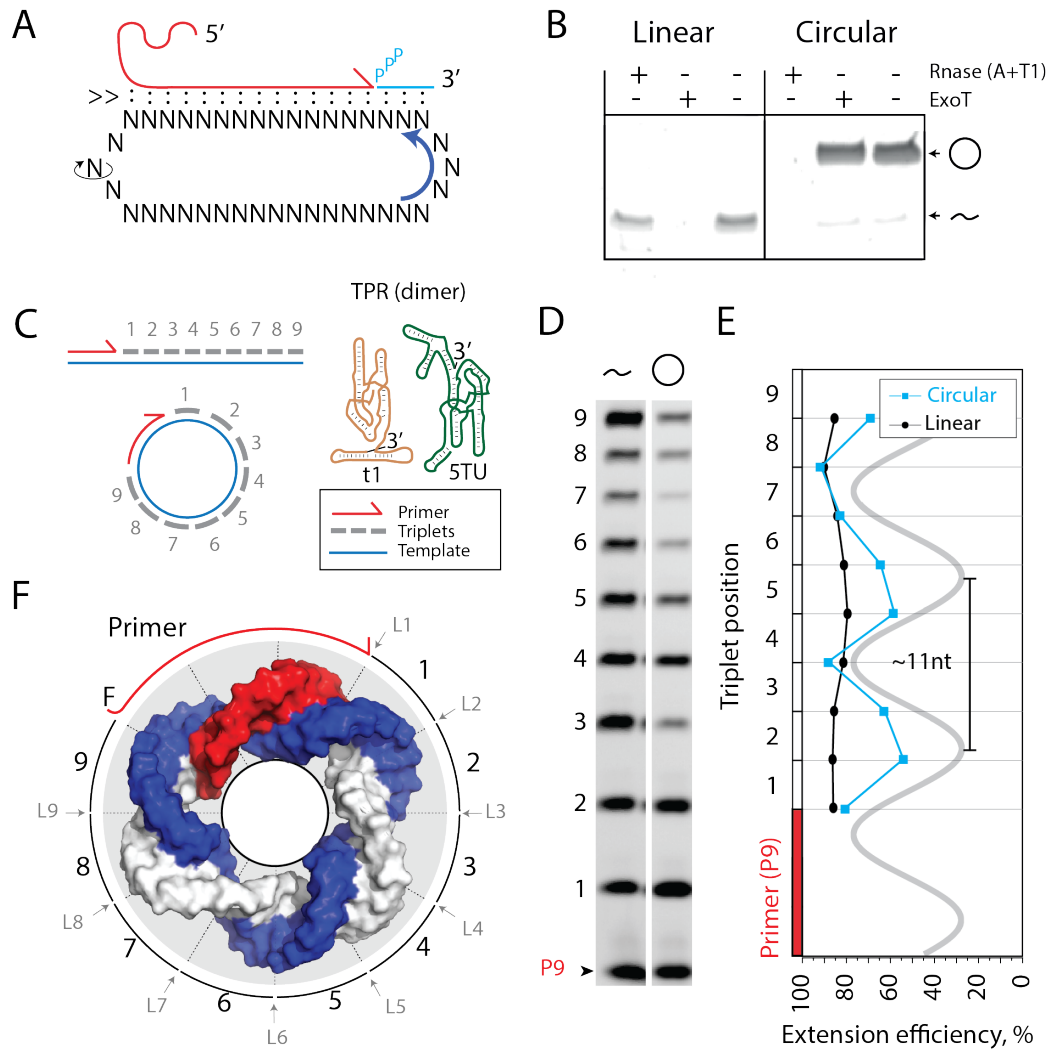

148

149 **Figure 1) Primer extension on circular RNA templates.** A) Schematic illustration of the RCS  
 150 mechanism. Red product RNA strand is extended by a triplet in the 3' end while the 5' end dissociates  
 151 by three base pairs keeping the total hybridization energy constant. Topological relaxation is allowed  
 152 by rotation in the single stranded part of the circular template illustrated by swivelling arrow. B) Linear  
 153 or circularized RNA is treated with or without endo- or exonucleases (RNase A/T1 mix or Exonuclease  
 154 T, respectively). C) Primer extension scheme by the TPR on a linear or circular RNA template. D) PAGE  
 155 gel of TPR primer extension, P9 is the unextended (fluorophore labelled) primer, bands 1-9 denote  
 156 extension of P9 by 1-9 triplets, 9 extensions being full length. E) Extension efficiency of formation of  
 157 band 1-9 in D) (see Materials and Methods) is plotted against triplet position. F) Schematic model of  
 158 scRNA illustrating the different accessibility of in- or outside facing ligation junctions showing the scRNA  
 159 template (blue), P9 primer (red) and the product strand (light grey). Original gel images and numerical  
 160 values are supplied in Figure 1-source data 1.

161

162 Despite the reduced extension efficiency in scRNA, we obtained full circle extension products  
 163 for multiple templates (34 to 58 nt in size, Figure 2A, B) with a clear trend towards increasing  
 164 mean extension efficiency for circular templates with increasing size predicting parity with the  
 165 linear template at around 120 nt (Figure 2C). Note, in these experiments extension beyond  
 166 full circle was not intended or possible (lane 1 to 6 in Figure 2B) as the specific triplet  
 167 substrates needed for displacing the primer were not present in the reaction.

168

169 Having established full-length synthesis on scRNA templates, we next tested if primer  
170 extension could proceed beyond full circle requiring duplex invasion and displacement of the  
171 primer / product strand. We first tested this using primer P10+3, comprising a 5' extension of  
172 three GAA repeats, thus covering the last three UUC triplet binding sites on the circular  
173 templates (Figure 2B top right). We observed a extension of up to three bands above the full  
174 circle mark (Figure 2B lane 7-12), indicating displacement of the primer 5'-end upon  
175 incorporation of three additional pppGAA triplets. This showed that “beyond full circle”  
176 synthesis including strand displacement is possible on scRNA templates boding well for the  
177 implementation of full RCS. To that effect, we next optimized buffer and extension conditions  
178 for more efficient extension above the full circle mark (Figure 2 - Figure supplement 1).  
179 Interestingly, greater dilution of reaction mixtures prior to freezing resulted in more efficient  
180 stand displacement. Greater dilution does not alter the final solute concentrations within the  
181 eutectic phase (Attwater et al., 2010) but increases the eutectic phase / ice interface area.  
182 This suggest that strand invasion may be aided by surface effects, as previously suggested  
183 for RNA refolding (Mutschler et al., 2015). Under these optimized buffer and extension  
184 conditions, we observed progressive accumulation of longer and longer RCS products, over  
185 prolonged reaction times (up to 6 weeks) (Figure 2D) with reaction speed decreasing after ca.  
186 4 weeks incubation, indicating continued RCS over extended periods of time (Figure 2E, F).  
187

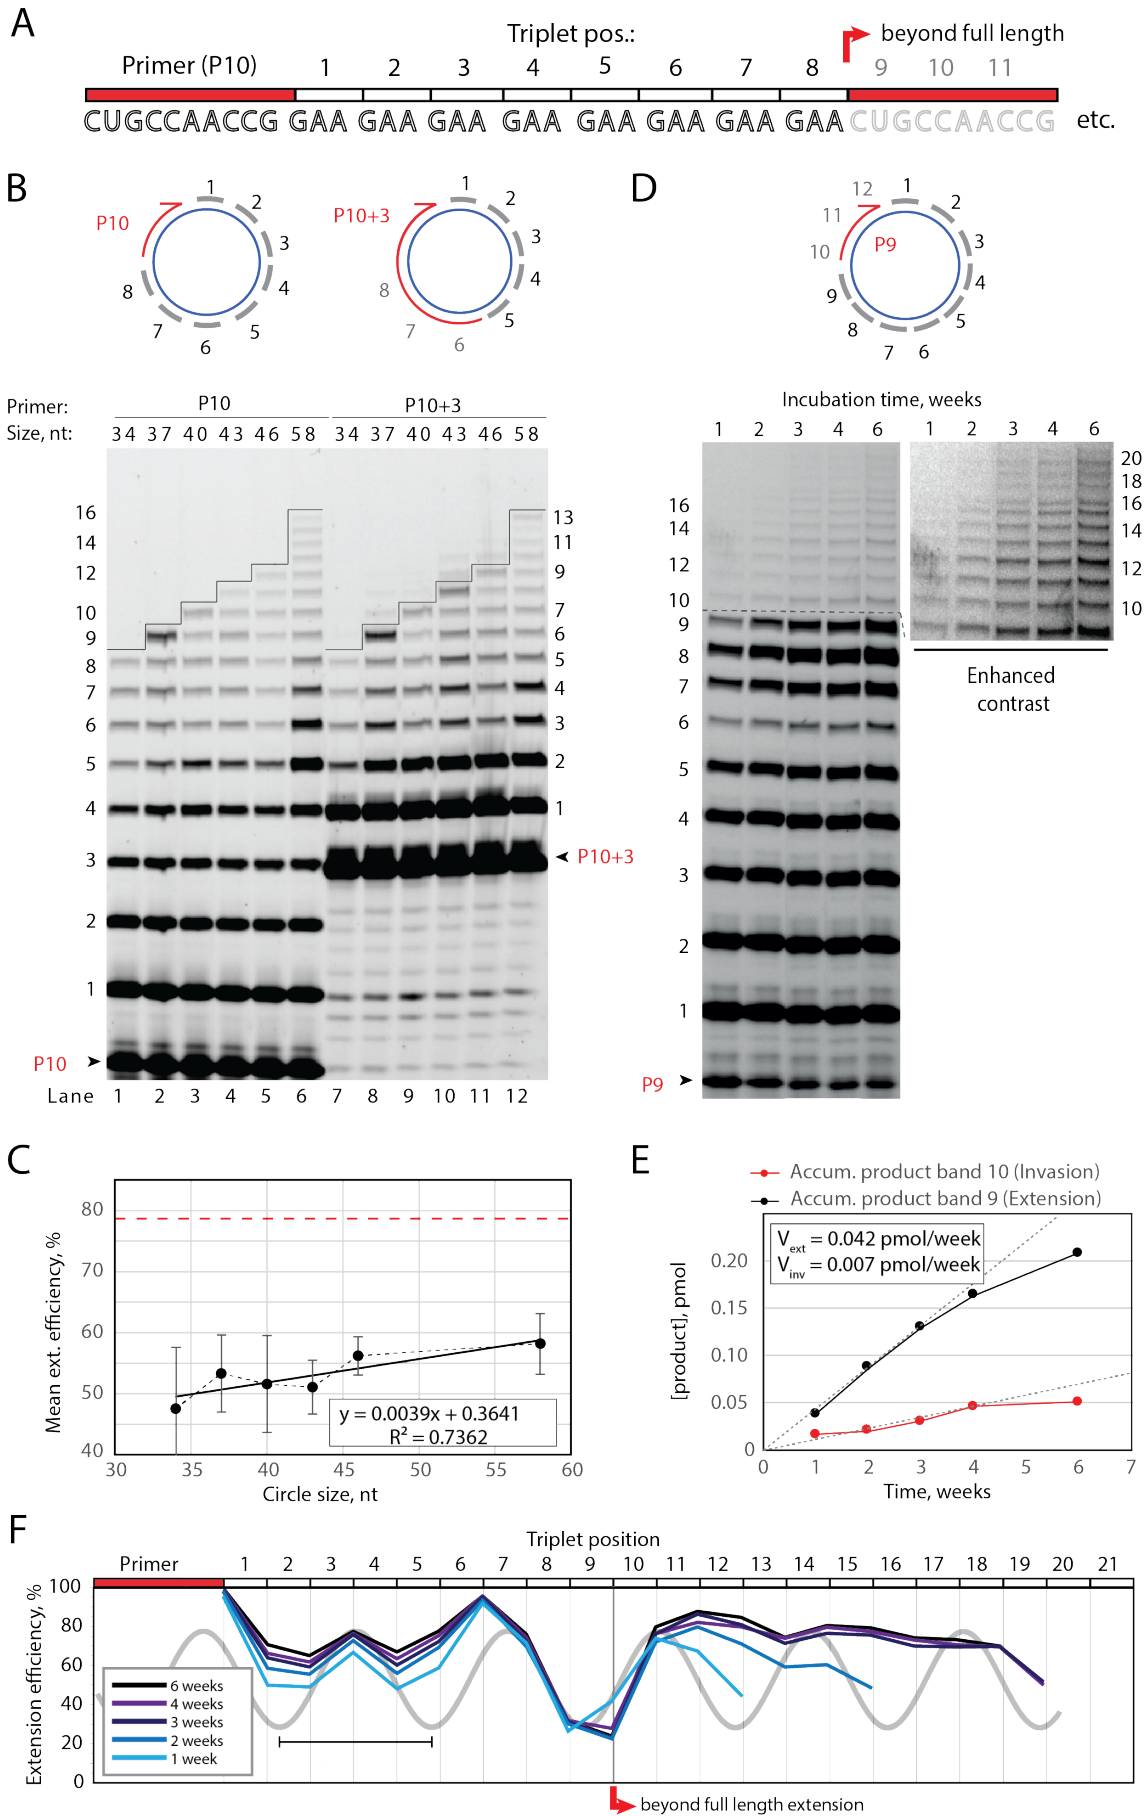



189 **Figure 2) Full-length and beyond full-length RNA-catalysed RNA synthesis on circular RNA**  
190 **templates.** A) Product strand of primer extension experiments with primer P10 (red) and 8 triplet scRNA  
191 template strand. Potential beyond full-length synthesis is shown as opaque. B) Various scRNA template  
192 sizes allow full-length primer extension as indicated (with 8 triplet sites) (blue), GAA triplets (black) and  
193 primers P10 (FAM-CUGCCAACCG) or P10+3 (FAM-CUGCCAACCG-GAA-GAA-GAA) (red). PAGE of  
194 primer extensions (under standard conditions) with full-length synthesis for different scRNA templates  
195 marked by a black line. C) Mean extension efficiency plotted as a function of circle size calculated from  
196 extension experiments including B) (Error-bars indicate standard deviation,  $n=5$ ), with mean extension  
197 efficiency for a linear RNA template (red dashed line). D) scRNA template 36 nt 12xUUC-repeat and  
198 primer P9 and PAGE of time-course of primer extension (optimized conditions). Thin black line (after  
199 band 9) marks full circle synthesis. Bands 10+ (see enhanced contrast gel) indicate beyond full-length  
200 synthesis (invasion). E, F) Mean extension efficiency (from gel in D) plotted against time (E) or triplet  
201 position (F) showing the respective amounts of product at full (black) and beyond full circle (red)  
202 synthesis as well as the efficiency drop at full length, which recovers once beyond full-length synthesis  
203 is initiated.  $V_{ext}$  and  $V_{inv}$  denotes the calculated velocity of formation of band 9 and 10, respectively.  
204 Original gel images and numerical values are supplied in Figure 2-source data 1.  
205

### 206 **Molecular dynamics simulations of 36 nt scRNA**

207 To better understand the structural and topological constraints of RCS on scRNAs, we  
208 performed atomistic MD simulations over 400 ns of the different RCS stages, comprising the  
209 starting scRNA template as circular single-stranded RNA (ssRNA) and scRNA with a  
210 progressively extended double-stranded RNA (dsRNA) parts (Figure 3). For simplicity, a 36  
211 nt circular RNA sequence of (UUC)<sub>12</sub> was chosen as a template strand (similar to the scRNA  
212 template in Figure 1, 2D) for direct comparison with the experimental system. The  
213 complementary strand comprising GAA triplets starting from 9 bp dsRNA (corresponding to  
214 binding of primer P<sub>9</sub>) was extended (in triplet increments) from 18, 21, 24, 27 till 30 bp of  
215 dsRNA (corresponding to extension products in bands 3, 4, 5, 6 and 7 in the gel in Figure 1D),  
216 using the most representative structure of the previous simulation as a starting point for the  
217 next one.

218 The simulation trajectories revealed the high energy barrier of dsRNA for bending and  
219 accommodating a circular shape (Figure 3A). Instead, we observe that, as dsRNA is  
220 elongated, the remaining ssRNA segment of the scRNA becomes increasingly extended. As  
221 the dsRNA part reaches 27 bp (corresponding to band 6 in Figure 1C), the ssRNA segment  
222 was fully extended and torsional strain was relieved by dissociation (“peeling off”) of the  
223 dsRNA 5’ and 3’ ends rather than by bending or the introduction of kinks into the dsRNA  
224 segment (Figure 3B). Subsequently, multiple peeling off and rebinding events were observed  
225 during the trajectories indicating that the dynamics of this process are fast (Supplementary  
226 Movie 1 and 2).  
227

228 In the experimental data, we observed a larger than expected inhibitory effect for insertion of  
229 the final triplets (extension to 33 and 36 nt of dsRNA, bands 8 and 9 in Figure 2D into the  
230 corresponding scRNA template). This may reflect the onset of the 3’ and 5’ end destabilization  
231 observed in simulations (Figure 3), which would likely attenuate primer extension by the

232 ribozyme. Our data shows a further slowdown in triplet incorporation when RCS is extended  
233 beyond full circle. We hypothesize that this might be caused by rebinding of the displaced  
234 strand on the template and interference with ribozyme extension. According to our simulations,  
235 the displaced strand would be >9 nt and, thus, long enough to reach the template strand and  
236 hybridize to the complementary repetitive sequence.

237

238 As a control for the observed dsRNA end destabilization mechanism, we also ran a simulation  
239 of a linear RNA molecule containing four triplets and a nick between two of them, but observed  
240 neither base opening nor dissociation at any strand end (Figure 3 - Figure supplement 1).  
241 Groove dimensions and local helical parameters (roll, twist and slide) for the RCS simulations  
242 on circular RNA did not show any major adjustment compared with the linear RNA control  
243 (Figure 3 - Figure supplement 2). We observed an oscillation of high / low values of bending  
244 along the molecule in phase with RNA-turn periodicity in an attempt to create an overall  
245 curvature (Velasco-Berrelleza et al., 2020), although with moderate success (~60° on an arc  
246 length of 30 bp of dsRNA) and no formation of kinks or other disruption of the canonical A-  
247 form typical of the RNA duplex (Figure 3 - Figure supplement 2).

248

249 To mirror the experimental eutectic phase conditions, simulations were run at relatively high  
250 Mg<sup>2+</sup> concentrations (100 mM) and compared with the presence of monovalent ions like K<sup>+</sup>  
251 (200 mM) and high concentration of Mg<sup>2+</sup> (500 mM), but simulations did not show any major  
252 differences in terms of melting or dsRNA bending (Figure 3 - Figure supplement 1, 2).  
253 However, Mg<sup>2+</sup> compared to K<sup>+</sup> makes more stable interactions with different parts of the RNA  
254 and, consequently, may increase the probability of distorted conformations facilitating the  
255 exposition of nucleobases at the 5' and 3' ends. On the contrary, K<sup>+</sup> counter ions are mainly  
256 positioned along the major and minor groove, allowing the bases to orient towards the inside  
257 of the dsRNA helix for base-pairing interactions (Figure 3C and Figure 3 - Figure supplement  
258 3). The role of Mg<sup>2+</sup> in the stabilization of complex RNA folding has been observed repeatedly  
259 in several structures (Sponer et al., 2018), like the ribosome (Klein et al., 2004) and the  
260 Hepatitis delta virus ribozyme (Nakano et al., 2001). Increasing MgCl<sub>2</sub> concentration to 500  
261 mM does not seem to bring extra benefit, as the system appears to be saturated already at  
262 100 mM Mg<sup>2+</sup> (Figure 3 - Figure supplement 3, 4).

263 In summary, our simulations support the notion that a circular RNA template (in the presence  
 264 of  $Mg^{2+}$  ions) leads to increased dynamics of nucleobase exposure, RNA duplex  
 265 destabilization and 5' and 3' end melting, which may facilitate strand displacement during RNA  
 266 replication. The simulations clearly show the implausibility of a small circular fully dsRNA  
 267 molecule (as schematically illustrated in Figure 1E) due to the prohibitive energetic cost of  
 268 bending of the dsRNA. Instead, the system appears to relieve internal strain by extending the  
 269 ssRNA segment of the circle (partially shielding the dsRNA segment) and peeling of both  
 270 dsRNA 5' and 3' ends (Figure 3), consistent with the helical period of triplet extension observed  
 271 (Figure 1, 2) (with ligation junctions facing into the ssRNA centre being less accessible) and  
 272 the observed reduction in RCS efficiency. Dynamic destabilization of dsRNA 5' ends may aid  
 273 continuous extension of the 3' end (RCS) and would be predicted to manifest itself in RNA  
 274 circles up to 200 bp as suggested by RNA persistence length (Abels et al., 2005).  
 275

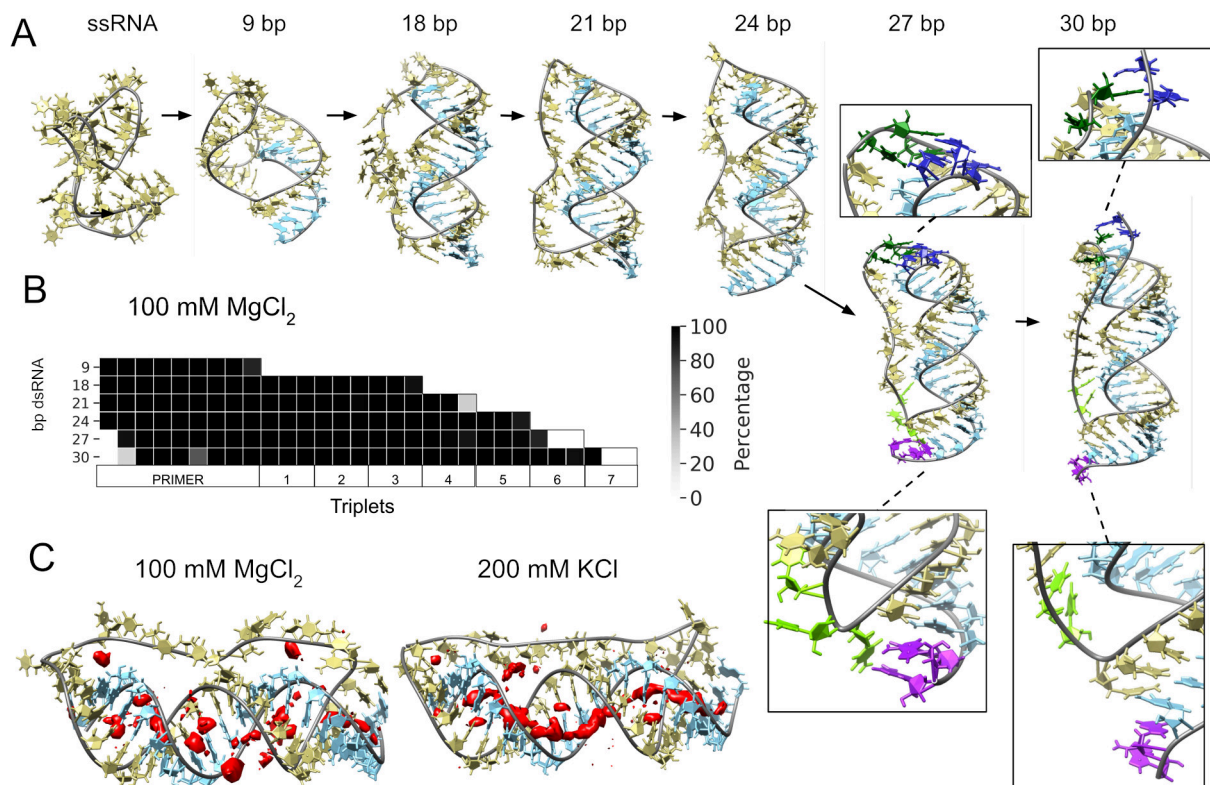

276 **Figure 3) Molecular dynamics simulation of circular RNA.** A) Main conformations (and  
 277 zoom-in to relevant regions (squares)) observed from simulations in 100 mM  $MgCl_2$  on scRNA  
 278 exploring consecutive states of primer extension, from 9 to 30 bp dsRNA with pyrimidine  
 279 (template) strand  $(UUC)_{12}$  (khaki), purine (product) strand (GAA) (light blue), 5' end and  
 280 unpaired bases (dark blue) and 3' end unpaired bases (purple) and matching melted bases  
 281 from the template strand (dark green (5' end) / light green (3' end)). B) Percentage of frames  
 282 from the last 100 ns of the simulations presenting canonical hydrogen bond pairing for each  
 283 bp. C) Counterion-density maps (in red) around RNA molecules that show an occupancy  $\sim 10$   
 284 times or greater than the bulk concentration.  
 285

## 286 **Templated rolling circle RNA synthesis**

287 Having validated RNA synthesis on scRNA templates (Figure 1, 2) we next sought to establish  
288 RCS beyond a single “orbit” involving displacement of the primer and nascent strand. To this  
289 end, we designed barcoded templates that would allow us to distinguish TPR-made RNA  
290 products arising from non-templated terminal transferase (TT) activity from those from  
291 templated RCS by sequencing. The barcoded small RNA templates (termed A-D) were  
292 prepared either as circular or linear RNAs comprising different internal triplet “barcodes” (at  
293 position 3, 6 and 9) of variable GC-content for individual identification (Figure 4A and Figure  
294 4 - Figure supplement 1). On these, we performed one-pot primer extension experiments, in  
295 which all four templates (either A-D linear or A-D circular) were mixed in equal proportions.  
296 After gel electrophoresis, the area above full-length extension products were excised, RNA  
297 recovered, and sequenced (Figure 4 - Figure supplement 1).

298  
299 Analysis of the sequencing products from the one-pot reaction showed template-dependent  
300 high-fidelity RNA synthesis up to full length (position 9) for all templates (linear and circular)  
301 (Figure 4B). Further, all templates gave longer than full-length products indicative of continued  
302 RNA synthesis by the TPR after full length (positions >9). However, the fidelity dropped after  
303 full length indicative of significant non-templated terminal transferase-like (TT) activity in this  
304 regime (Figure 4B). For example, the average fidelity for insertion of the expected triplet  
305 (<sup>ppp</sup>GAA) for position 10 (full length +1) for circular templates was 10.9% whereas for position  
306 9 (full length) it was 89.9%. For linear templates, the fidelity for full length +1 dropped to 0.7%  
307 compared to full length 78.8%. Note, that fidelity at full length +1 dropped much more for linear  
308 than for circular templates. For this reason, the probability of a product extending to longer  
309 than full length (positions 10-12) with the correct sequence was many fold higher for circular  
310 compared to linear RNA templates (Figure 4C). A few events of blunt-end ligation with other  
311 template / product strands (see e.g. position 15 for linear template C and D) (Figure 4B) were  
312 also observed for linear templates.

313  
314 On all circular templates (with the exception of template B, where too few reads were obtained)  
315 extension beyond full length (while containing a significant TT component) continued to insert  
316 the barcode triplets correctly, indicating continuous RCS at least up to position 18 (63 nt, more  
317 than 1.5 “orbits” on the scRNA template).



319 **Figure 4) RNA-catalysed RNA synthesis beyond full length for circular templates.** A) Product  
320 strands of primer extension experiments with linear and scRNA templates A-D with primer P9<sub>1</sub>. Opaque  
321 sequence illustrate potential beyond full-length synthesis on scRNA. Barcode triplets at positions 3 (A/U  
322 rich) (cyan), 6 (mix) (blue), 9 (G/C rich) (purple) allow identification of product RNAs. Barcode triplet at  
323 position 15 (scRNA) is the same as that of position 3 but after one orbit on the circular template. B)  
324 Fidelity heat-map of the sequences derived from the one-pot experiments with linear (left) or circular  
325 (right) templates. Red colour indicates high prevalence of a given triplet (vertical axis) at the position  
326 noted (3-18). n: denotes the number of recovered sequence reads at each position. Transparent grey  
327 boxes cover positions with n≤5. C) Plot shows ratio (fold difference) of the probability of a product of  
328 reaching positions 4-12 on circular compared to linear templates. D) Model illustrating (1.) beyond full-  
329 length extension on a circular template (templated RCS) and (2.) on a linear template (non-templated).  
330 Full analysis of the data in Figure 4B is supplied in Figure 4-source data 1.  
331

332 Control experiments, with individually incubated templates (in contrast to the one-pot  
333 experiments) mixed after gel purification, showed essentially identical results (Figure 4 -  
334 Figure supplement 2A). Interestingly, non-diluted samples had a decreased fidelity at position  
335 10 (the point of strand invasion) compared to diluted samples (Figure 4 - Figure supplement  
336 2B) suggesting that dilution appears to aid not only extension efficiency (Figure 2 - Figure  
337 supplement 1D), but also strand invasion fidelity and continued templated synthesis. In  
338 summary, these results are consistent with RNA-catalysed RCS on scRNA templates beyond  
339 the full circle.

340

#### 341 **Multiple repeat rolling circle products**

342 Next we sought to test if RCS efficiency could be increased by double priming on the circular  
343 template, an approach known as branched RCS (Berr and Schubert, 2006). Indeed, we  
344 observed a higher degree of RCS with a 36 nt scRNA template (8211) having two identical  
345 primer sites leading to two different products being formed (product I or II) (Figure 5A, B). In  
346 order to test the primer site functionality individually we used different triplet combinations  
347 (Figure 5B). When only the <sup>ppp</sup>GAA triplet was present, primers were extended only by two  
348 triplets as expected (lane 1 in Figure 5B) (with a small amount of non-templated TT  
349 incorporation of a 3rd triplet). When <sup>ppp</sup>GAA and <sup>ppp</sup>AUA or <sup>ppp</sup>GCG triplets were added,  
350 respectively (lane 2 or 3 in Figure 5B), products extended up to 5 triplet-incorporations with  
351 extension stopping at triplet 6 (coding for CUG) showing that both primer sites were  
352 functioning. Finally, when all triplets (<sup>ppp</sup>GAA, <sup>ppp</sup>AUA, <sup>ppp</sup>GCG, <sup>ppp</sup>CUG) were present,  
353 extension continued to beyond full circle (positions ≥10) (Figure 5B) and bands corresponding  
354 to extension products exceeding two whole orbits (> triplet 21 (63nt)) of replication were  
355 observed (Figure 5C).

356

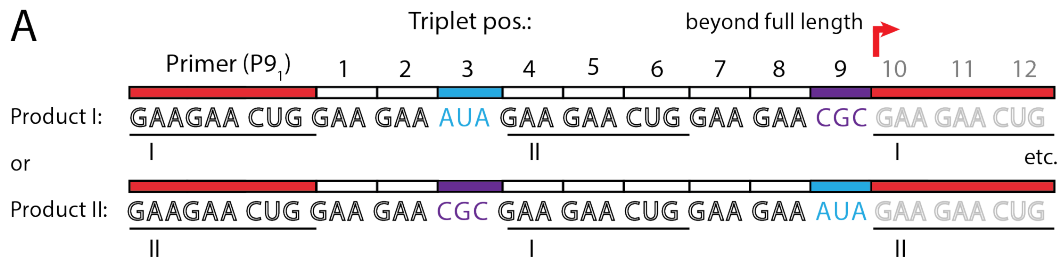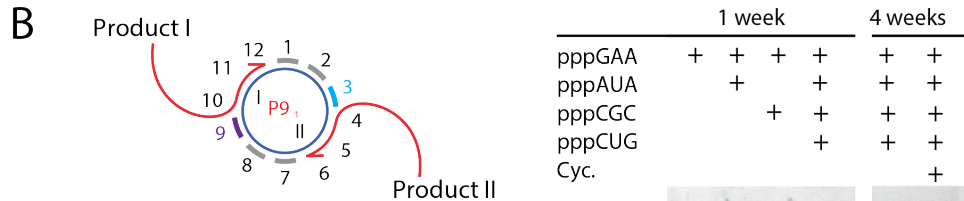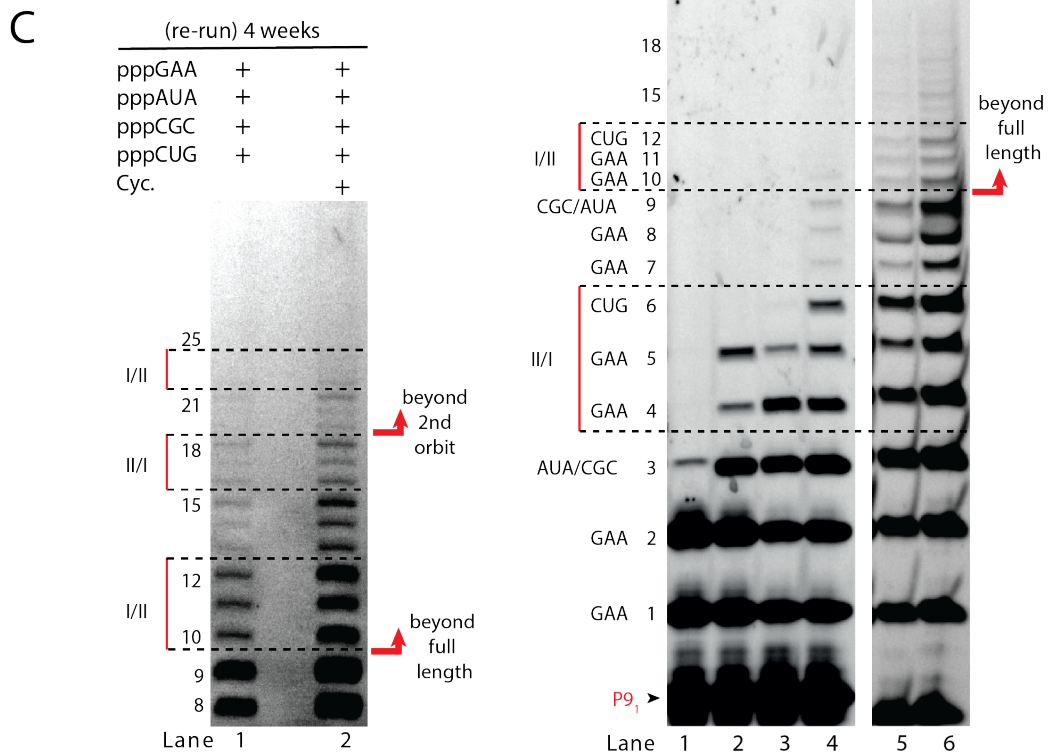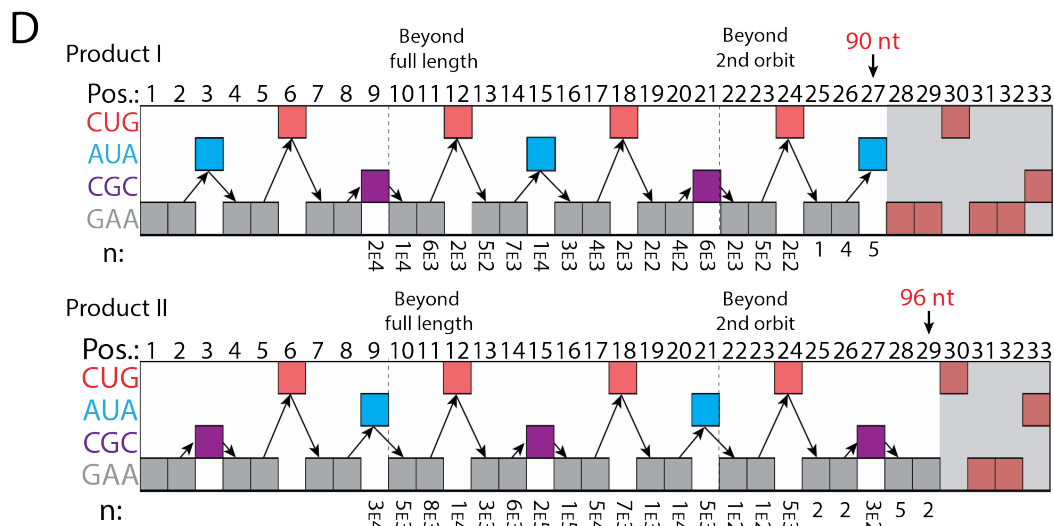

358 **Figure 5) RNA-catalysed branched RCS.** A) Product strand of primer extension experiments with  
359 scRNA template containing two priming sites (I and II) for primer P9<sub>1</sub>. Depending on the priming site  
360 two different products will be made (I or II). B, C) Scheme and PAGE of primer extension experiments  
361 with only the noted triplets added with C) long electrophoretic separation to achieve optimal resolution  
362 of long products. Cycling (Cyc.) indicates that the samples had been exposed to four thermal and  
363 freeze-thaw cycles (80 °C 2 min, 17 °C 10 min, -70 °C 5-15 min, -7 °C 7 days) leading to increased  
364 efficiency. D) Sequencing of longer than full length branched RCS products on the double primer site  
365 scRNA (without cycling). Products I and II both reaching almost three full rounds of replication of the  
366 circular RNA template (up to 96 nt, 32 triplet incorporations). Original gel images and full analysis of the  
367 data in Figure 5D are supplied in Figure 5-source data 1.  
368

369 Sequencing of the long, branched RCS RNA products (excised from band  $\geq 15$  triplets, Figure  
370 5 - Figure supplement 1) identified a range of long reads (from both products I and II) including  
371 many reads of the product with 15 correct triplet incorporations (Figure 5E) representing  $\sim 1.5$   
372 orbits ( $n: 7 \times 10^3$  and  $1 \times 10^5$  reads of Product I and II, respectively). However, much longer  
373 sequences were present in decreasing numbers of reads, with the longest products  
374 comprising 29 correct triplet incorporations (96 nt) ( $n=2$ ) representing RCS of more than 2.5  
375 orbits and the longest reported product synthesised by the TPR. Thus, RNA-catalysed RCS  
376 has the potential to yield extended RNA concatemer products under isothermal conditions.  
377 Freeze-thaw (FT) cycles have been shown to enhance ribozyme activity by effecting RNA  
378 refolding (Mutschler et al., 2015) and indeed inclusion of 4 FT cycles lead to more efficient  
379 production of longer RCS RNA products (Figure 5B and C). In summary, isothermal conditions  
380 allow RCS of long concatemeric products containing multiple ( $>2.5$ ) copies of the scRNA  
381 template with RCS efficiency further enhanced by FT cycling.

382

### 383 **Proto-viroid like self-circularizing ribozyme**

384 A number of biological systems including viroids uses an RCS strategy for genome replication.  
385 However, RCS synthesis of RNA concatemers is only one part of the viroid replication cycle,  
386 which also involves resection (i.e. cleavage) of the concatemer into individual units and  
387 circularisation of unit length RNAs by ligation to recreate the original circular RNA genome.

388 As both RNA cleavage and RNA ligation can be efficiently catalysed by RNA, we sought to  
389 investigate if a viroid-like replication cycle might be catalysed by RNA alone. To this end, we  
390 designed a proto-viroid RNA comprising a 39 nt scRNA template encoding a designed micro-  
391 hammerhead ribozyme ( $\mu$ HHz) as well as its substrate for cleavage (Figure 6A). The  $\mu$ HHz  
392 could be synthesized by the TPR (Figure 6B). Furthermore, the  $\mu$ HHz could catalyse both self-  
393 cleavage (forming a 2',3' cyclic phosphate ( $>p$ )) and re-ligation leading to circularization (under  
394 RCS reaction conditions at  $-7^\circ\text{C}$  in eutectic ice) (Figure 6C, lane 2). A similar equilibrium  
395 between cleavage and ligation in eutectic ice had previously been observed for the unrelated  
396 hairpin ribozyme (Mutschler et al., 2015).



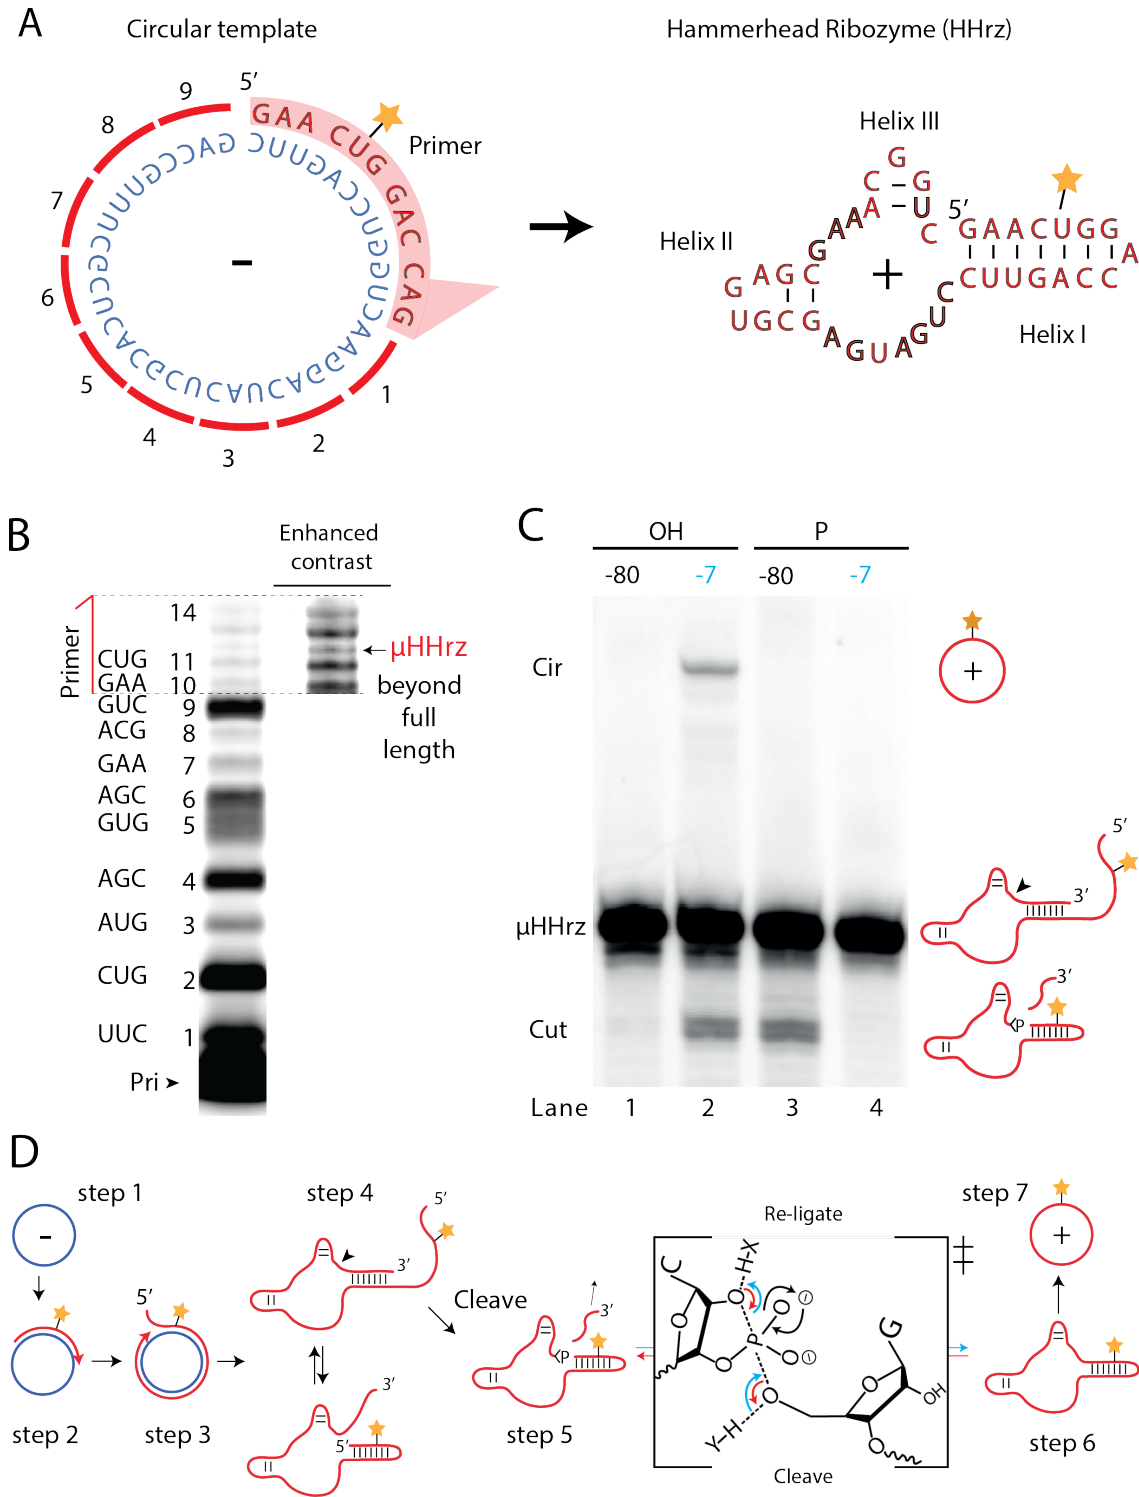

397

398 **Figure 6) Steps of a viroid-like replication cycle catalysed by RNA alone.** A) Illustration of the  
 399  $\mu$ HHRz (-) and (+) strand. B) PAGE gel showing primer extension of RCS synthesis of the  $\mu$ HHRz with  
 400 substrate overhang to allow self-cleavage. C) PAGE gel showing cleavage and circularization of the  
 401  $\mu$ HHRz, but only when incubated at  $-7^\circ\text{C}$ , allowing eutectic phase to form, and with a free 5'-OH, needed  
 402 for circularization, but not for cleavage. D) Schematic illustration of the RNA-catalysed viroid-like  
 403 replication with steps comprising RNA-catalysed combined RCS (1-3), resection (4, 5) and self-  
 404 circularization. (6, 7). Original gel images are supplied in Figure 6-source data 1.

405

406 When the  $\mu$ HHz had been 5'-phosphorylated (Figure 6C, lane 3) only cleavage but no  
407 circularization was seen, as phosphorylation blocks the 5'-hydroxyl nucleophile for re-ligation  
408 (see steps 5 and 6, Figure 6D). To the best of our knowledge, the  $\mu$ HHz is the smallest (39  
409 nt) self-cleaving and -circularizing RNA system reported to date and the first time self-  
410 circularization has been shown in a Hammerhead ribozyme. Kinetic analysis of the cleavage  
411 and circularization reaction show a slow but accumulating amount of cleavage product as a  
412 function of time (black points in Figure 6 - Figure supplement 1A). Analysing the ratio between  
413 linear (cleaved) and circular (ligated) products (Figure 6 - Figure supplement 1) showed that  
414 the proportion of circle was initially very high (approx. 40% after 0.5 day). Based on this, it is  
415 likely that all or most  $\mu$ HHz molecules are transiently circular at some point immediately after  
416 cleavage, but become progressively trapped in a state unable to re-ligate, most likely due to  
417 hydrolysis of the >p or misfolding. While only completing half of a full replication cycle  
418 (formation of a (+)-strand scRNA from a (-)-strand scRNA template, these results outline the  
419 potential for a full viroid-like rolling circle RNA replication cycle based on RNA-catalysis alone.

## 420 Discussion

421 Viroids are transcriptional-parasites composed entirely of a circular RNA genome and are  
422 considered the simplest infectious pathogens known in nature. They lack protein coding  
423 regions in their genome, and can be completely replicated in ribosome-free conditions (Daròs  
424 et al., 1994; Diener, 2003; Fadda et al., 2003; Flores et al., 2009). They can comprise a circular  
425 RNA genome of as little as ~300 nt in e.g. *Avsunviroidae* encoding a Hammerhead ribozyme  
426 responsible for maturation by resecting the RNA genome (Flores et al., 2000). The resected  
427 viroid genome is then ligated (circularized) by a host protein (e.g. tRNA ligase) (Nohales et  
428 al., 2012). Due to the simplicity of this replication strategy, viroids have been suggested to  
429 represent possible “relics” from a primordial RNA-based biology (Diener, 1989; Flores et al.,  
430 2014). Indeed circular RNA genomes would present a number of potential advantages for  
431 prebiotic RNA replication, including increased stability by end protection (Litke and Jaffrey,  
432 2019), a reduced requirement for specific primer oligonucleotides to sustain replication  
433 (Attwater et al., 2018; Szostak, 2012) or resolve the end replication problem, i.e. the loss of  
434 genetic information from incomplete replication in linear genomes. Circular RNA structures  
435 self-assemble from RNA mononucleotides through wet-dry cycling (Hassenkam et al., 2020)  
436 and a virtual circular genome has been suggested as a model for primordial RNA replication  
437 (Zhou et al., 2021). Thus, Viroid-like systems are likely candidates to have emerged as the  
438 simplest Darwinian systems even before self-replication.

439

440 Here we have explored to what extent such a potentially prebiotic replication strategy can be  
441 carried out with RNA alone. Our data shows that RNA can indeed facilitate RCS on scRNA  
442 templates yielding concatemeric RNA products, which can be processed (i.e. resected) and  
443 recircularized by an encoded ribozyme in a scheme reminiscent of viroid replication. Thus,  
444 one half of full a viroid replication cycle ((-)-strand replication leading to a self-circularizing (+)-  
445 strand) can be carried out by just two ribozymes.

446 Completing the viroid replication cycle would require the reverse (+)-strand replication leading  
447 to a self-circularizing (-)-strand product and may require a second ribozyme (e.g. a second  
448  $\mu$ HHrz) encoded in the (-)-strand akin to the mechanism used by natural viroids (Flores et al.,  
449 2000).

450

451 MD simulations indicate that the RCS process is aided by accumulating strain in the nascent  
452 dsRNA segment leading to increased peeling off of dsRNA 5' and 3' ends (i.e. strand  
453 displacement). In turn, this peeling off creates a more dynamic environment potentially aiding  
454 5' end invasion by extending the 3' end. This topological strain induced strand displacement  
455 may be general and independent of the precise RCS mechanism on scRNA templates and  
456 thus should also apply to non-enzymatic polymerization of RNA. Our observation that RCS

457 can be enhanced by the use of branched extension, freeze-thaw thermocycling and pre-  
458 freezing dilution may also relate to this. While the precise mechanistic basis for these  
459 enhancements is currently unknown, it seems plausible that all of these enhance 5' product  
460 strand end displacement by accelerating conformational equilibration through RNA un- and  
461 refolding as observed previously (Mutschler et al., 2015).

462

463 In biology, both viroids and Hepatitis D virus (HDV) replication proceeds through RCS on  
464 circular RNA genomes mediated by proteinaceous RNA polymerases but RCS has also been  
465 reported for circular DNA templates and proteinaceous DNA polymerases in nature  
466 (Wawrzyniak et al., 2017) and in biotechnology (Daubendiek et al., 1995; Givskov et al., 2016;  
467 Kristoffersen et al., 2017; Mohsen and Kool, 2016). dsDNA persistence length is somewhat  
468 shorter than dsRNA (dsDNA: 45-50 nm (140-50 nt) vs. dsRNA 60 nm (200 nt) and stacking  
469 interactions weaker than in dsRNA (Kebbekus et al., 1995; Svozil et al., 2010), therefore  
470 dsDNA may more readily adopt a circular shape or kinks to alleviate build-up of strain or to  
471 adopt strong bends (Wolters and Wittig, 1989), we would nevertheless expect the a similar  
472 strand displacement effect would play part. Indeed, in both cases RCS proceeds efficiently for  
473 circular genomes ranging from a few hundred nt to over 1.5kb (Mohsen and Kool, 2016). In  
474 contrast, RNA-catalysed polymerization (record of producing approx. 200 nt products  
475 (Attwater et al., 2013)) is currently limited to RCS on small RNA circles. A more efficient RNA-  
476 catalysed RCS-based replication strategy will likely require improvements to the ribozyme  
477 polymerase catalytic activity, speed and processivity as well as the design of the template.  
478 Improvements to ribozyme polymerase processivity, which is known to be poor (Johnston et  
479 al., 2001; Lawrence and Bartel, 2003), might have the greatest impact and might be realized  
480 either through e.g. tethering or other topological linkages to the circular template (Cojocar  
481 and Unrau, 2021). A more processive polymerase ribozyme should also result in less non-  
482 templated triplet TT activity, which appears to be a consequence of slow RCS extension and  
483 is likely aggravated by peeling off of the 3' end. Thus more efficient RCS may also require the  
484 stabilization of the 3' end triplet junction in the ribozyme active site in the same way as primer  
485 / nascent strand termini are stabilized within the active sites of proteinaceous RNA- and DNA  
486 polymerase (Chim et al., 2018; Houlihan et al., 2020). Finally, introduction of secondary  
487 structure motifs in the RNA nascent strand might drive increased 5' dissociation (e.g. through  
488 formation of stable hairpin structures) relieving strain at the 3'-end.

489 Larger circular RNA templates might provide advantages for the RCS as they are less strained  
490 and provide increased access to the internal face of the circle and might also be able to encode  
491 the whole ribozyme itself. On the other hand, reduced torsional strain on the dsRNA would be  
492 expected to reduce strand invasion and "peeling off" of the product strand . All of these factors  
493 merit detailed investigation.

494

495 In conclusion, our motivation for investigating RNA-catalysed RCS was as a potential solution  
496 towards the so-called “strand inhibition problem”, the inhibition of RNA replication by  
497 exceedingly stable RNA duplex products. This inhibition has not just a thermodynamic  
498 component, i.e. the significant amount of energy required to melt such duplexes, but a kinetic  
499 component, because even if dissociation of RNA duplexes can be achieved, RNA replication  
500 must outpace duplex reannealing, which is rapid unless duplex concentrations are low or  
501 reactions take place in a highly viscous medium (He et al., 2017; Tupper and Higgs, 2021).  
502 In this context, we reasoned that RCS might provide favourable properties: synthesis and  
503 strand displacement on a circular template can proceed essentially iso-energetically as base-  
504 pairing (H-bonding / stacking) interactions broken in the product strand during strand  
505 displacement are continuously compensated for by new base-pairing interactions formed in  
506 the nascent strand. In turn, this could lead to an open-end formation of template coupled  
507 stoichiometric excess of single stranded RNA product strand to encode functions to further aid  
508 replication as we show here with resection and recircularisation by an encoded ribozyme.

509 In the course of this work, we discovered another mechanism that might contribute to  
510 overcoming the strand inhibition problem. MD simulations indicate that - at least - on small  
511 RNA circles – the build-up of strain in the nascent dsRNA could aid strand displacement  
512 (Figure 3). However, the MD simulations also suggest that strain is non-directional destabilizes  
513 both nascent strand 5'- as well as 3'-end likely inhibiting extension and promoting non-  
514 templated triplet addition. Thus, the potential advantages of scRNA RCS seems to be  
515 tempered by opposing effects such as strain as well as reduced template accessibility due to  
516 circular RNA ring geometry (Figure 1). Nevertheless, we find that a viroid-like replication  
517 strategy can be accomplished by RNA catalysis alone, with one ribozyme performing RCS on  
518 circular RNA templates yielding concatemeric RNA products, which can be processed (i.e.  
519 resected) and recircularized by a second ribozyme. Future improvements in polymerase  
520 ribozyme activity and processivity may allow all necessary components of such a replication  
521 cycle to be encoded on a circular RNA “genome” and propagated by self-replication and -  
522 processing reactions.

## 523 **Materials and methods**

### 524 *Oligonucleotides*

525 Base sequences of all oligonucleotides used throughout this work can be found in  
526 Supplementary file 1.

527

### 528 *In vitro transcription*

529 dsDNA templates (containing T7 promotor sequence at the 5' end upstream of the region to  
530 transcribe) for *in vitro* transcription was generated by “fill-in” using three cycles of mutual  
531 extension using GoTaq HotStart, (Promega, Madison, Wisconsin) between the relevant  
532 oligonucleotide and primers: 5T7 or HDVrt (the latter for defined 3' terminus formation  
533 (Schürer et al., 2002))

534 The T7 transcription protocol used is based on Megascript. Briefly explained, transcriptions of  
535 RNA requiring a triphosphate at the 5'-end (termed GTP Transcription) reaction were carried  
536 out under the following conditions: 40 mM Tris-Cl pH 8, 10 mM DTT, 2 mM spermidine, 20  
537 mM MgCl<sub>2</sub>, 7.5 mM each NTP (Thermo Fisher Scientific), dsDNA templates (varying amount,  
538 preferably >5 μM), 0.01 units/μL of inorganic pyrophosphatase (Thermo Fisher Scientific,  
539 Waltham, Massachusetts), ~50 μg/μL of T7 RNA polymerase (home made by Isaac Gallego).  
540 Reactions were left overnight (~16 hours) at 37°C. Then 0.5x volume EDTA (0.5 M) was added  
541 together with (at least) 2.5x volume of loading buffer (final conditions >50% formamide or >8M  
542 Urea and 5 mM EDTA). For transcription of RNA with a monophosphate 5'-end (termed GMP  
543 Transcription) the same procedure is followed as for NTP Transcription, however 10 mM GMP  
544 and 2.5 mM of each NTP instead of the higher amount of NTP used for GTP transcription.

545

#### 546 *Gel electroporation for analysis or purification*

547 The sample in appropriate loading buffer were separated on 10-20% 8 M Urea denaturing  
548 PAGE gel using an EV400 DNA Sequencing Unit (Cambridge Electrophoresis). The product  
549 band was visualised by UV shadowing (for non-labelled RNA) or florescence scanning  
550 (Typhoon scanner, Amersham Typhoon) (for labelled RNA). When needed the identified  
551 product based on relative migration was excised. The excised gel fragment was then  
552 thoroughly crushed using a pipette tip and suspended in 10 mM Tris-Cl pH 7.4 to form a slurry.  
553 For freeze and squeeze extraction, the slurry was frozen in dry ice, then heated to 50°C (~5  
554 min) and finally left rotating at room temperature (from 2 hours to overnight) to elute the  
555 product from the gel material. The eluate was then filtered using a Spin-X column (0.22 μm  
556 pore size, Costar), ethanol precipitated, (100 mM Acidic acid and 80% ethanol (10 ug glycogen  
557 carrier was present when noted)). UV absorbance was measured with a Nanodrop ND-1000  
558 spectrophotometer (Thermo Fisher Scientific) to determine yield of redissolved purified RNA.

559

#### 560 *Calculation of extension efficiency*

561 Gel Images from the Typhoon scanner where analysed in ImageQuant software (Cytiva life  
562 science) for quantifying band-intensity. Quantified band intensities were exported to Excel  
563 (Microsoft, Redmond, Washington) for further analysis. Extension efficiency ( $E$ ) for a given  
564 band ( $b$ ) was calculated as the sum of the intensities ( $I$ ) of all the bands from  $b$  to  $n$ , ( $n$  being  
565 the highest detectable band), divided by the sum of  $I$  of all bands from  $b-1$  to  $n$ :

566 
$$E_b = \frac{\sum_b^n I_b}{\sum_b^n I_{b-1}} \quad (1)$$

567 Thus,  $E$  represents the efficiency of the given ligation junction ( $L_b$ ) to allow production of the  
568 extension product in band  $b$ , *i.e.* the extension efficiency.

569

### 570 *Triplet transcription*

571 Triplets were prepared via run-off *in vitro* transcription with T7 RNA polymerase. More details  
572 on the method can be found in (Attwater et al., 2018). Reaction conditions were as follows:  
573 100 pmols of DNA template for each triplet was mixed with equimolar DNA oligo 5T7 to form  
574 the template for transcription. For triplets starting with purines, the NTP transcription protocol  
575 was used as described above with a total NTP concentration of 30 mM but only adding the  
576 nucleotides necessary for the triplet (e.g. AUA was transcribed with only ATP and UTP). For  
577 triplets starting in pyrimidines a lower total NTP concentration was used (4.32 mM) as this  
578 yielded better defined bands for purification. 50  $\mu$ L transcription reactions were stopped with  
579 2  $\mu$ L EDTA (0.5M) and 5  $\mu$ L of 100% glycerol was added to facilitate gel loading. The samples  
580 were separated by 30% 3 M Urea denaturing PAGE as described above. Correct sequence  
581 composition was confirmed by A260/280 absorbance ratio, measured with the Nanodrop.

582

### 583 *Circularization of RNA*

584 Linear 5'-end monophosphate labelled RNA to be used for circularization was either prepared  
585 by *in vitro* transcription (300  $\mu$ L reaction volume) or ordered directly as chemically synthesized  
586 RNA (Integrated DNA Technologies (IDT), Iowa, United States). Linear RNA was gel purified  
587 as described above. When needed purified RNA was treated with T4 polynucleotide kinase  
588 (PNK) (New England Biolabs (NEB), Ipswich, Massachusetts) to remove 3'-end cyclic  
589 phosphate then RNA was phenol/chloroform extracted, ethanol precipitated and redissolved  
590 in ddH<sub>2</sub>O. For splinted ligation, 3 pmol purified RNA was mixed with equimolar splint RNA in  
591 262.5  $\mu$ L ddH<sub>2</sub>O. The sample was heated to 80°C (2 min.) followed by cooling to 17°C (10  
592 min.) and finally incubated on ice (5-30 min.). Then reaction conditions were adjusted to 50  
593 mM Tris-HCl pH 7.5, 2 mM MgCl<sub>2</sub>, 1 mM DTT, 400  $\mu$ M ATP (1x T4 RNA ligase 2 reaction  
594 buffer (NEB)) including 0.25 units/ $\mu$ L T4 RNA ligase 2 (Neb) (final volume 300  $\mu$ L) and  
595 samples left over night (~16 hours) at 4°C. For non-splinted ligation, 10 pmol gel purified RNA  
596 was mixed in 237  $\mu$ L ddH<sub>2</sub>O followed by heating to 95°C and then quickly moved to ice. Then  
597 reaction conditions were adjusted to 50 mM Tris-HCl, pH 7.5, 10 mM MgCl<sub>2</sub>, 1 mM DTT (1x  
598 T4 RNA ligase reaction buffer (Neb)), 100  $\mu$ M ATP including 1 unit/ $\mu$ L T4 RNA ligase 1 (NEB)  
599 (final volume 300  $\mu$ L) and samples left over night (~16 hours) at 16°C. Circularized RNA was  
600 electrophorated by 10% 8M Urea denaturing PAGE for analysis and purification as described  
601 above.

602

603 *Templated RNA-catalysed RNA synthesis (the primer extension assay)*

604 Ribozyme activity assay was performed essentially as described in (Attwater et al., 2018). In  
605 a standard reaction (modified where specified), ribozyme heterodimer (5TU/t1), template,  
606 primer (5 pmol of each) and triplets (50 pmol of each) were annealed in 7.5  $\mu$ L water (80 °C 2  
607 min, 17 °C 10 min). Then 2.5  $\mu$ L 4x reaction buffer was added (final volume 10  $\mu$ L) and  
608 samples were left on ice for ~5 min to ensure folding. Final pre-frozen conditions were (unless  
609 otherwise noted) either (Tris buffer system) 50 mM Tris (pH 8.3 at 25 °C), 100 mM MgCl<sub>2</sub> and  
610 0.01% Tween20, or (CHES buffer system) 50 mM CHES (pH 9 at 25 °C), 150 mM KCl, 10  
611 mM MgCl<sub>2</sub> and 0.01% Tween20. At this point some samples (noted in the text) were diluted  
612 by adding ddH<sub>2</sub>O (e.g. 50x dilution corresponds to adding 490  $\mu$ L ddH<sub>2</sub>O to the 10  $\mu$ L  
613 samples). Finally, samples were frozen on dry ice and incubated at -7 °C in a R4 series TC120  
614 refrigerated cooling bath (Grant,Shepreth, UK) to allow eutectic phase formation and reaction,  
615 respectively.

616 To end the incubations, samples that had been diluted were thawed, moved to 2mL tubes,  
617 ethanol precipitated (with glycogen carrier) and redissolved in 10  $\mu$ L ddH<sub>2</sub>O. This step was  
618 avoided for undiluted samples that were already 10  $\mu$ L. Finally, 0.5  $\mu$ L EDTA (0.5M) was  
619 added to all samples to a final volume of 15  $\mu$ L. (In experiments where the effect of dilution  
620 was investigated, e.g. as experiment presented in Supporting Figure 5, ddH<sub>2</sub>O was added to  
621 all the thawed samples to reach the same volume before precipitation).

622 To prepare for separation of extension products, 3  $\mu$ L of the reacted samples after addition of  
623 EDTA (corresponding to 1 pmol template RNA) was diluted to reach the final loading  
624 conditions: 166 mM EDTA, 6M Urea (+ Bromophenol blue) and 10-20 pmol competing RNA  
625 (to prevent long product/template reannealing) (final volume 10  $\mu$ L). Finally, samples were  
626 denatured (95°C for 5 min) and RNA separated by 8M Urea denaturing PAGE.

627

628 *Sequencing of extension products*

629 In the primer extension reactions used for sequencing, the primer extension was performed  
630 as described above except for the following changes: 5 pmol ribozyme heterodimer/template,  
631 20 pmol primer (with a 5'adapter sequence) and 100 pmol of each triplet was used. In the  
632 cases where multiple templates were mixed in the same reaction (one-pot), the final template  
633 concentration remained 5 pmol in total. All reactions were done in the CHES buffer and were  
634 diluted 50x as standard.

635

636 *Adapter ligation and RT-PCR:* After Urea PAGE separation of the extension products, the  
637 noted region of the gel was dissected out, and carefully recovered as described above. The  
638 RNA was ethanol precipitated (80% ethanol with 10  $\mu$ g glycogen carrier) resulting in a dry



639 RNA pellet. To append an adaptor sequence to the 3'-end of the purified RNA products the  
640 dry RNA was redissolved in conditions allowing adenylated adapter ligation by T4 RNA Ligase  
641 2 truncated K227Q (Neb) following manufacturers descriptions. Final adapter ligation  
642 conditions were: 50 mM Tris-HCl, pH 7.5, 10 mM MgCl<sub>2</sub>, 1 mM DTT (1x T4 RNA ligase  
643 reaction buffer (NEB)), 15 % PEG8000, 0.04% Tween 20, 5 pmol adenylated DNA primer  
644 (Adap1, for base sequences see Supplementary file 1) and 20 U/μL T4 RNA Ligase 2  
645 truncated K227Q (Neb) (final volume 10 μL). The samples were then ligated at 16°C for two  
646 hours. Pre-adenylation of Adap1 using Mth RNA Ligase (Neb) was performed following  
647 manufacturers descriptions. After adapter ligation, samples were diluted 10-fold to achieve  
648 conditions for performing RT-PCR (25 cycles) using 0.5 μM forward (PCRp3) and reverse  
649 primer (RTp1) and the SuperScript III One-Step RT-PCR system with Platinum Taq DNA  
650 polymerase (Thermo Fisher Scientific). Finally, RT-PCR products were gel purified in 3%  
651 agarose gel and cleaned up using QIAGEN gel extraction kit (QiaGen, Hilden, Germany).

652

653 *Sanger sequencing*: Purified RT-PCR products were cloned in to pGEM vector using pGEM-  
654 T easy vector Systems (Promega) as described by manufacturer and transformed into heat-  
655 competent 10-Beta cells (NEB). Inserts from single colonies were PCR amplified (using  
656 primers pGEM\_T7\_Fo, pGEM\_SP6\_Ba) and send in for Sanger sequencing (Source  
657 bioscience) (using pGEM\_T7\_Fo as sequencing primer). Illumina sequencing: Illumina  
658 adaptors were added to purified RT-PCR products by PCR (15 cycles) using 0.5 μM forward  
659 (Illx\_Fo, x denotes different barcodes 1-15, see oligo sequences in supplementary material)  
660 and reverse primers (Ill\_Ba) and Q5 Hot-Start High-Fidelity 2X Master Mix (Neb). PCR  
661 products were gel purified in 3% agarose gel and qPCRred (using NEBNext Library Quant Kit  
662 for Illumina) to quantify concentration. Finally, the DNA (consisting of Illumina adapters,  
663 barcodes and RT-PCRred sequence from the RNA extension) were prepared following  
664 manufactures protocol for MiSeq Illumina sequencing (Illumina, San Diego, California) (see  
665 e.g. MiSeq System Guide).

666

#### 667 *Sequencing data analysis*

668 Illumina Sequencing data were acquired and processed as FASTQ files using Terminal (and  
669 available software packages such as FASTX-toolkit). Prior to analysis the whole output file  
670 from illumina sequencing runs (containing also unrelated sequences) was split based on  
671 barcodes identifying the individual samples and trimmed starting with the original (P9<sub>1</sub>) primer  
672 sequence (GAAGAACTG). After the P9<sub>1</sub> sequence, the triplets at positions 1, 2 ,3 etc. would  
673 be identifiable representing extension products made by the ribozyme. The presence for the  
674 3' adapter sequence (GTCGAATAT...) in the aligned sequences marked the end of the  
675 original RNA extension product. Sequencing data can be found as described below under

676 section data availability: File 1 include sequence data for circular and linear one-pot analysis  
677 (C1 and L1, respectively), File 2 include sequence data for branched RCS analysis (B3)).  
678 *Analysis of the one-pot experiments:* By counting the number of times a given triplet was  
679 present at a given position, we were able to calculate the fidelity for each triplet at this position.  
680 Identifying and counting the sequencing reads ( $n$ ) for each position was done using *grep* (in  
681 Terminal) with a list of all relevant sequences (positions 3 to 18) and the sequencing files. The  
682 triplet at position 3, the first barcode position, was used to classify the sequences into coming  
683 from template A to D and thus has 100% fidelity for the correct triplet (Figure 4B).

684  
685 In example, for analysing the fidelity ( $F$ ) of position 4, the following list was used:  
686 GAAGAACTG<sub>(primer)</sub>GAA<sub>(pos1)</sub>GAA<sub>(pos2)</sub>YYY<sub>(pos3)</sub>XXX<sub>(pos4)</sub>. Here YYY was either of the first  
687 barcode triplets for templates A-D, (ATA<sub>(template A)</sub>, AAA<sub>(template B)</sub>, TTA<sub>(template C)</sub> or ATC<sub>(template D)</sub>)  
688 and XXX was either of the 14 possible triplets (CTG, ATA, CCA, CCC, AAA, CAC, GGG, TTA,  
689 TCC, GGC, ATC, GAT, CGC, GAA).  $F$  at position 4 was then calculated for template A-D as  
690 the number of occurrences of a triplet in position 4 (e.g. CCA) divided by the sum of  
691 occurrences of all the triplets multiplied by 100%. A generalized term for calculating the  $F$  at  
692 all positions (3-18) and for all templates (A-D) is:

$$693 \quad F_{(a,Y)} = \frac{n_{(xxx,a,Y)}}{\text{Sum}(n_{(XXX,a,Y)})} \times 100\% \quad (2)$$

694 Here  $F$  is the fidelity,  $a$  is the position of the triplet,  $Y$  is the template A-D.  $n$  is the number of  
695 sequencing reads for a given triplet (xxx) for position  $a$  on template  $Y$  or for all the 14 triplets  
696 (XXX), for  $a$  on  $Y$ . Eventually, the fidelity for positions 3-15 in the context of template A-D for  
697 all triplets was plotted in Figure 4B. Accumulated chance for a product of reaching positions  
698 X (shown in plot in Figure 4C) was calculated by multiplying all fidelities for moving from  
699 position 3 to position X with correct triplets (fidelities found in Figure 4C). Data for this analysis  
700 can be found as described in data availability section below (File 1). Numerical data and  
701 calculation is supplied in Figure 4-source data 1.

702 *Analysis of the branched RCS:* By counting the number ( $n$ ) of correct sequences with a specific  
703 length ending in the 3'adapter sequence, we identified long RCS products (Figure 5D). This  
704 was done using *grep* (in Terminal) with a list of all relevant sequences (positions 9 to 30, both  
705 product I and II), and the sequencing file. Data for this analysis can be found as described in  
706 data availability section below (File 2) Numerical data and calculation is supplied in Figure 5-  
707 source data 1.

708

#### 709 *Self-circularizing Micro Hammerhead ribozyme assay*

710 RNA catalysed synthesis of fluorophore labelled self-circularizing micro Hammerhead  
711 ribozyme was prepared in 2x large (500 pmol) reactions set up and incubated as described

712 above. Specifically, 500pmol ribozyme heterodimer (5TU/t1) and circular template  
713 (HHrzCtemp alt7), 2000 pmol primer (HHrzP12) and 50  $\mu$ mol of each of the triplets were  
714 annealed followed by adding buffer to 50 mM CHES, pH 9; 150 mM KCl; 10 mM MgCl<sub>2</sub>, 0.05%  
715 Tween 20 (1mL). Then the sample was diluted 50 times to a final volume of 50 mL. After 4  
716 weeks incubation at -7 °C, EDTA was added (5mM final concentration), reactions were thawed  
717 and concentrated to a final volume of ~300  $\mu$ L using a centrifugation filter (Amicon Ultra, 3  
718 kDa cut off) retaining long RNA products. Micro Hammerhead ribozyme RNA (marked in  
719 Figure 6C) was purified by gel electrophoresis and excised product was dissolved to 10  $\mu$ M in  
720 H<sub>2</sub>O with 0.5 mM EDTA.

721  
722 Chemically synthesized fluorophore labelled self-circularizing micro Hammerhead ribozyme  
723 RNA (IDT) was gel purified as described above and excised product was dissolved to 10  $\mu$ M  
724 in H<sub>2</sub>O with 0.5mM EDTA.

725  
726 *micro Hammerhead ribozyme cleavage/circularization assay*

727 Micro hammerhead self-circularization assays comprise 10 pmol micro HHrz annealed (80 °C  
728 2 min, 17 °C 10 min) in 4  $\mu$ L water with 1  $\mu$ L 5x reaction buffer, final reaction conditions: 50  
729 mM CHES, pH 9; 150 mM KCl; 10 mM MgCl<sub>2</sub> (same as for the Templated RNA-catalysed  
730 RNA synthesis). Then incubated in ice for 5 min to ensure folding. This was then frozen on  
731 dry ice and either moved to -7 °C for eutectic phase formation (reaction) or -80 °C (control).  
732 After incubation, 10  $\mu$ L loading buffer (95% Formamide, 25 mM EDTA, Bromophenol blue)  
733 was added directly to the cold samples to stop the reaction and mixed while thawing. Finally,  
734 reactions were analysed by 20% denaturing PAGE like described above.

735  
736 5' phosphorylation of micro HHrz RNA with polynucleotide kinase (NEB) as done following  
737 manufacturer's directions. RNA was then phenol/chloroform washed, precipitate and  
738 dissolved in ddH<sub>2</sub>O with 0.5mM EDTA to 10  $\mu$ M (determined by Nanodrop).

739  
740 *Molecular Dynamics simulations.*

741 All simulations were set up with the AMBER 18 suite of programs and performed using the  
742 CUDA implementation of AMBER's pmemd program (Case, n.d.). A linear ssRNA of 36 nt with  
743 the sequence (UUC)<sub>12</sub> was built using the NAB utility, which was then circularised using an in-  
744 house programme (Pyne et al., 2021). From there, the complementary strand containing GAA  
745 triplets was progressively grown representing the different stages of the rolling circle  
746 replication, containing 9, 18, 21, 24, 27 till 30 nt of dsRNA keeping the rest single-stranded.  
747 For each stage, a representative structure was used as a scaffold to grow the dsRNA part and  
748 thus build the structure to model next stage. A linear dsRNA fragment containing 4 GAA triplets

749 with a nick between the first and second was run as a control. This molecule had a total length  
750 of 16 bp as it was capped by a CG dimer on each end.

751 The AMBER99 forcefield (Cheatham et al., 1999) with different corrections for backbone  
752 dihedral angles including the parmBSC0 for  $\alpha$  and  $\gamma$  (Pérez et al., 2007) and the parmOL3 for  
753  $\chi$  (glycosidic bond) (Zgarbová et al., 2011) were used to describe the RNA. All initial structures  
754 were explicitly solvated using a truncated octahedral TIP3P box with a 14 Å buffer. They were  
755 neutralized by two different types of salt, KCl and MgCl<sub>2</sub>, described by the ‘scaled charged’  
756 Empirical Continuum Correction (ECC) set of ion parameters (Duboué-Dijon et al., 2018), and  
757 with the necessary ion pairs (Machado and Pantano, 2020) for matching 0.2 M in the case of  
758 KCl, and 0.1 and 0.5 M in the case of MgCl<sub>2</sub>. Simulations were performed at constant T and  
759 P (300 K and 1 atm) following standard protocols (Noy and Golestanian, 2010) for 400 ns.

760 The last 100 ns sampled every 10 ps were used for the subsequent analysis. AMBER program  
761 CPPTRAJ (Roe and Cheatham, 2013) was used to determine base-pair step parameters,  
762 radial distribution functions of ions around RNA and distances between atoms, including  
763 groove width and hydrogen bonds. The latter were defined with a distance cutoff of 3.5 Å and  
764 an angle cutoff of 120°. Counterion-density maps were obtained using Canion (Lavery et al.,  
765 2014) and were subsequently visualized with Chimera (Pettersen et al., 2004). SerraNA  
766 software was used to calculate curvatures at different sub-fragment lengths (Velasco-  
767 Berrelleza et al., 2020).

768

769 **Acknowledgements:**

770 This work was supported by the Carlsberg Foundation (ELK), by the Medical Research  
771 Council (MRC) program grant program no. MC\_U105178804 (PH), by the Engineering and  
772 Physical Sciences Research Council (EPSRC) grant EP/N027639/1 (AN) and by the  
773 EPSRC (EP/R513386/1) (MB). Simulations were performed on JADE (EP/T022205/1)

774

775 Thanks to the HecBiosim consortium (EP/R029407/1), Cambridge Tier-2 (EP/P020259/1)  
776 and the local York facilities.

777

778 Correspondence and requests for materials should be addressed to P.H.

779

780

781 **Author contributions**

782 ELK and PH conceived and designed experiments. ELK performed all experiments except  
783 molecular dynamics simulation (AN). All authors analysed data, discussed results and co-  
784 wrote the manuscript.

785

786

787 **Competing interests**

788 The authors declare no competing interest.

789

790 **Additional files**

791 Supplementary file 1. Oligonucleotide sequences.

792

793 Transparent reporting form.

794

795 **Data availability**

---

796 Simulations are available at the University of York Data

797 Repository ([10.15124/b92977bd-f016-4740-8b4a-f86c68d5eb2c](https://doi.org/10.15124/b92977bd-f016-4740-8b4a-f86c68d5eb2c)).

798 Sequencing data used for analysis presented in Figure 4 (File 1) and 5 (File 2) are available  
799 on Dryad (<https://doi.org/10.5061/dryad.tht76hf10>).

800

801 **Figure supplements and Movies**

802 **Figure 1 - Figure supplement 1.** Purification of circularized RNA. Identification and dissection  
803 of circularized RNA were performed by denaturing PAGE. Representative SyBr Gold stained  
804 10% Urea PAGE gel is shown here for illustrating the circularization process of circular RNA

805 templates used in main text Figure 2B. In the gel, RNA before (odd lanes) and after (even  
806 lanes) ligation with T4RNA ligase 2 was analysed. A 10 nucleotide (nt) RNA splint (covering  
807 5 nt of the 5'-end and 3'-end of the linear RNA strand) was used for circularization as required  
808 by T4 RNA ligase 2. In the ligated samples, multiple bands (A-D) appeared representing  
809 various combinations of ligated RNA strands. By migration analysis (right panel), we identified  
810 A and C as linear constructs and B and D as circularized constructs (illustrations of the  
811 identified structure of A-D can be seen to the right of the gel). Monomeric circularized RNA  
812 (corresponding to band B) was dissected out and used throughout this work. Bands A-D  
813 discussed here should not be confused with templates A-D used in main text figure 4. Original  
814 gel is supplied in Figure 1-Figure supplement 1-source data 1.

815

816 **Figure 2 - Figure supplement 1.** Optimization of Rolling Circle Synthesis. A) Comparison  
817 between linear and circular primer extension using the CHES reaction buffer system (similar  
818 to main text Figure 1D that is in the Tris buffer system). Extensions performed at -7 °C for 2  
819 weeks. B) The periodic oscillations were observed with various repeat sequence templates  
820 (CGG, GAC and GAA) in both CHES and Tris buffer systems. Extensions performed at -7 °C  
821 for 4 weeks. C) Dilution of samples increased the efficiency. The plot in C) shows the  
822 difference in extension efficiency ( $\Delta$ -extension efficiency) between the undiluted (Un.) and the  
823 2-50 fold diluted (x2-x50) samples. The  $\Delta$ -extension efficient of the ligations before invasion  
824 (mean of bands 1-9) were unaffected by the dilution (giving a  $\Delta$ -extension efficient of ~1).  
825 However, the  $\Delta$ -extension efficiency of band 10 (full length +1 triplet, invasion) increased  
826 strongly with dilution. Extensions performed at -7 °C for 1 week. D) The same effect of dilution  
827 (improving invasion) was seen over a range of MgCl<sub>2</sub> concentrations (50-200 mM).  
828 Extensions performed at -7 °C for 1 weeks. All extension reactions presented here were run  
829 at standard reaction conditions described in main text Materials and Methods except when  
830 specified otherwise for dilution, salt or buffer system. E) Image of the whole gel where parts  
831 are shown in main text figure 2D. Original gels and numeric values are supplied in Figure 2-  
832 Figure supplement 1-source data 1.

833

834 **Figure 3 - Figure supplement 1.** Percentage of frames from the last 100 ns of the simulations  
835 presenting canonical hydrogen bond pairing for each base pair (bp): A) Linear RNAs solvated  
836 with the three buffers (100 mM KCl, 200 mM MgCl<sub>2</sub> and 500 mM MgCl<sub>2</sub>); B) Rolling circle RNA  
837 synthesis (RCS) simulations solvated with 100 mM KCl; C) RCS simulations solvated with 500  
838 mM Mg Cl<sub>2</sub>.

839

840 **Figure 3 - Figure supplement 2.** A-E) Averages and standard deviations (as error bars) of  
841 bp-step parameters (roll, slide and twist) together with major and minor groove widths (MajW

842 and MinW, respectively) calculated over the last 100 ns of the simulations. The trajectory of  
843 the 16 bp linear RNA is labelled as 16L. F) Bending profile for all the sub-fragments 4 bp-long  
844 along 30 bp of dsRNA embedded in a 36-bp circular ssRNA.

845

846 **Figure 3 - Figure supplement 3.** Counterion-density maps around RNA molecules that show  
847 an occupancy  $\sim 10$  times or greater the bulk concentration (in red) as seen in simulations.  
848 These areas are the molecular regions where cations localize preferentially. In the case of 200  
849 mM KCl, these align along the grooves, whereas, in the case of  $MgCl_2$ , they tend to be closer  
850 to the backbone and bridge distant backbone points, making the bases more exposed.  
851 Extremely high  $Mg^{2+}$  concentrations provide similar interacting profiles to moderate levels  
852 indicating saturation on the preferred binding sites in both cases.

853

854 **Figure 3 - Figure supplement 4.** Averages and standard deviations (as error bars) of radial  
855 distribution functions (rdf) of cations around RNA backbone phosphates. The rdf indicate the  
856 probability of finding an ion within a certain distance of a particular RNA atom in relation to its  
857 bulk concentration (set at 1). Magnesium ions make more direct interactions with RNA  
858 backbone (first peak) and mediated by water molecules (subsequent peaks) than potassium.  
859 The smaller rdf peaks observed on 500 mM compared to 100 mM indicate a relatively lower  
860 ion condensation around RNA with respect to bulk concentration due to saturation.

861

862 **Figure 4 - Figure supplement 1.** Deep sequencing of extension products. A) Representative  
863 SyBr Gold stained 10% Urea PAGE gel showing linear and circularized circular templates A-  
864 D. B) 10% Urea PAGE separation of one-pot extension reaction used for deep sequencing.  
865 Dashed box denotes excised region (above the full-length product (band 9)) used for RNA  
866 recovery and Deep-sequencing. C) Illustration of the protocol for sequencing of extension  
867 products. The initial extension products gets gel purified, then 3'-adaptor ligated with a 5'-  
868 adynalated DNA adapter strand, and finally RT-PCR amplified (adding additional adapter  
869 sequences) and submitted for sequencing. Original gels are supplied in Figure 4-Figure  
870 supplement 1-source data 1.

871

872 **Figure 4 - Figure supplement 2.** Controls for deep-sequencing data. A) Plot shows the fidelity  
873 ratio at the noted triplet positions between extension reactions where the templates were  
874 incubated either in one-pot (Mix) or in individual tubes (Ind). This is shown for the circular  
875 templates (blue lines) and linear templates (orange line). B) The effect of dilution with water  
876 leads to increased fidelity at the point of invasion (position 10). Bar chart show the fidelity for  
877 insertion of the expected triplet at position 10 (making invasion) calculated from deep-  
878 sequenced samples that were either not diluted (Un.) or diluted 50 fold (x50).

879

880 **Figure 5 - Figure supplement 1.** 10% Urea PAGE separation of circular template extension  
881 reaction used for deep sequencing. Excised gel piece is marked with green.

882

883 **Figure 6 - Figure supplement 1.** kinetic analysis of the micro HHz. A) Quantification of band  
884 intensities as a function of time. Here we see that cut RNA accumulate while the amount of  
885 circular RNA seems to reach an equilibrium. B) Fraction of circular RNA relative to cut as a  
886 function of time. This plot shows that a very high amount of circle is formed at short time points  
887 slowly dropping in relation to non-circular cut RNA.

888

889 **Supplementary Movie 1.** Movie of the RCS simulation where dsRNA is 27 bp long. We  
890 observe fraying and annealing of 5' and 3' ends demonstrating the quick timescales of these  
891 transitions.

892

893 **Supplementary Movie 2.** Movie of the RCS simulation where dsRNA is 30 bp long. We  
894 observe again fraying and annealing of 5' and 3' ends demonstrating the quick timescales of  
895 these transitions.

896

897



898 **References**

- 899 Abels JA, Moreno-Herrero F, Van Der Heijden T, Dekker C, Dekker NH. 2005. Single-  
900 molecule measurements of the persistence length of double-stranded RNA. *Biophys J*  
901 **88**:2737–2744. doi:10.1529/biophysj.104.052811
- 902 Attwater J, Raguram A, Morgunov AS, Gianni E, Holliger P. 2018. Ribozyme-catalysed RNA  
903 synthesis using triplet building blocks. *Elife* **7**. doi:10.7554/eLife.35255
- 904 Attwater J, Wochner A, Holliger P. 2013. In-ice evolution of RNA polymerase ribozyme  
905 activity. *Nat Chem* **5**:1011–1018. doi:10.1038/nchem.1781
- 906 Attwater J, Wochner A, Pinheiro VB, Coulson A, Holliger P. 2010. Ice as a protocellular  
907 medium for RNA replication. *Nat Commun* **1**. doi:10.1038/ncomms1076
- 908 Becker S, Feldmann J, Wiedemann S, Okamura H, Schneider C, Iwan K, Crisp A, Rossa M,  
909 Amatov T, Carell T. 2019. Unified prebiotically plausible synthesis of pyrimidine and  
910 purine RNA ribonucleotides. *Science (80- )* **366**:76–82. doi:10.1126/science.aax2747
- 911 Berr A, Schubert I. 2006. Direct labelling of BAC-DNA by rolling-circle amplification. *Plant J*  
912 **45**:857–862. doi:10.1111/j.1365-313X.2005.02637.x
- 913 Bhattacharyya A, Murchie AIH, Lilley DMJ. 1990. RNA bulges and the helical periodicity of  
914 double-stranded RNA. *Nature* **343**:484–487. doi:10.1038/343484a0
- 915 Blanco L, Bernad A, Lazaro JM, Martin G, Garmendia C, Salas M. 1989. Highly efficient  
916 DNA synthesis by the phage  $\Phi$ 29 DNA polymerase. Symmetrical mode of DNA  
917 replication. *J Biol Chem* **264**:8935–8940.
- 918 Case DA et al. n.d. Amber 2018 Reference Manual. <http://ambermd.org/contributors.html>.
- 919 Cech TR. 2000. The ribosome is a ribozyme. *Science (80- )*.  
920 doi:10.1126/science.289.5481.878
- 921 Cheatham TE, Cieplak P, Kollman PA. 1999. A modified version of the cornell et al. force  
922 field with improved sugar pucker phases and helical repeat. *J Biomol Struct Dyn*  
923 **16**:845–862. doi:10.1080/07391102.1999.10508297
- 924 Chim N, Jackson LN, Trinh AM, Chaput JC. 2018. Crystal structures of DNA polymerase I  
925 capture novel intermediates in the DNA synthesis pathway. *Elife* **7**.  
926 doi:10.7554/eLife.40444
- 927 Cojocar R, Unrau PJ. 2021. Processive RNA polymerization and promoter recognition in an  
928 RNA World. *Science (80- )* **371**:1225–1232. doi:10.1126/science.abd9191
- 929 Daròs JA, Marcos JF, Hernández C, Flores R. 1994. Replication of avocado sunblotch  
930 viroid: Evidence for a symmetric pathway with two rolling circles and hammerhead  
931 ribozyme processing. *Proc Natl Acad Sci U S A* **91**:12813–12817.  
932 doi:10.1073/pnas.91.26.12813
- 933 Daubendiek SL, Ryan K, Kool ET. 1995. Rolling-Circle RNA Synthesis: Circular  
934 Oligonucleotides as Efficient Substrates for T7 RNA Polymerase. *J Am Chem Soc*

- 935       **117**:7818–7819. doi:10.1021/ja00134a032
- 936 Deguzman V, Vercoutere W, Shenasa H, Deamer D. 2014. Generation of oligonucleotides  
937       under hydrothermal conditions by non-enzymatic polymerization. *J Mol Evol* **78**:251–  
938       262. doi:10.1007/s00239-014-9623-2
- 939 Diener TO. 2003. Discovering viroids — a personal perspective. *Nat Rev Microbiol* **1**:75–80.  
940       doi:10.1038/nrmicro736
- 941 Diener TO. 1989. Circular RNAs: Relics of precellular evolution? *Proc Natl Acad Sci U S A*  
942       **86**:9370–9374. doi:10.1073/pnas.86.23.9370
- 943 Duboué-Dijon E, Mason PE, Fischer HE, Jungwirth P. 2018. Hydration and Ion Pairing in  
944       Aqueous Mg<sup>2+</sup> and Zn<sup>2+</sup> Solutions: Force-Field Description Aided by Neutron  
945       Scattering Experiments and Ab Initio Molecular Dynamics Simulations. *J Phys Chem B*  
946       **122**:3296–3306. doi:10.1021/acs.jpcc.7b09612
- 947 Ekland EH, Bartel DP. 1996. RNA-catalysed RNA polymerization using nucleoside  
948       triphosphates. *Nature* **382**:373–376. doi:10.1038/382373a0
- 949 Fadda Z, Daròs JA, Fagoaga C, Flores R, Duran-Vila N. 2003. Eggplant Latent Viroid, the  
950       Candidate Type Species for a New Genus within the Family Avsunviroidae  
951       (Hammerhead Viroids). *J Virol* **77**:6528–6532. doi:10.1128/jvi.77.11.6528-6532.2003
- 952 Flores R, Daròs JA, Hernández C. 2000. Avsunviroidae family: Viroids containing  
953       hammerhead ribozymes. *Adv Virus Res*. doi:10.1016/s0065-3527(00)55006-4
- 954 Flores R, Gago-Zachert S, Serra P, Sanjuán R, Elena SF. 2014. Viroids: Survivors from the  
955       RNA world? *Annu Rev Microbiol*. doi:10.1146/annurev-micro-091313-103416
- 956 Flores R, Gas ME, Molina-Serrano D, Nohales MÁ, Carbonell A, Gago S, De la Peña M,  
957       Daròs JA. 2009. Viroid replication: Rolling-circles, enzymes and ribozymes. *Viruses*.  
958       doi:10.3390/v1020317
- 959 Freier SM, Kierzek R, Jaeger JA, Sugimoto N, Caruthers MH, Neilson T, Turner DH. 1986.  
960       Improved free-energy parameters for predictions of RNA duplex stability. *Proc Natl*  
961       *Acad Sci U S A* **83**:9373–9377. doi:10.1073/pnas.83.24.9373
- 962 Givskov A, Kristoffersen EL, Vandsø K, Ho YP, Stougaard M, Knudsen BR. 2016. Optimized  
963       detection of Plasmodium falciparum topoisomerase I enzyme activity in a complex  
964       biological sample by the use of molecular beacons. *Sensors (Switzerland)* **16**:1916.  
965       doi:10.3390/s16111916
- 966 Goldman AD, Kacar B. 2021. Cofactors are Remnants of Life's Origin and Early Evolution. *J*  
967       *Mol Evol*. doi:10.1007/s00239-020-09988-4
- 968 Hassenkam T, Damer B, Mednick G, Deamer D. 2020. AFM images of viroid-sized rings that  
969       self-assemble from mononucleotides through wet–dry cycling: Implications for the origin  
970       of life. *Life* **10**:1–11. doi:10.3390/life10120321
- 971 He C, Gállego I, Laughlin B, Grover MA, Hud N V. 2017. A viscous solvent enables

- 972 information transfer from gene-length nucleic acids in a model prebiotic replication  
973 cycle. *Nat Chem* **9**:318–324. doi:10.1038/nchem.2628
- 974 Hieronymus R, Müller S. 2019. Engineering of hairpin ribozyme variants for RNA  
975 recombination and splicing. *Ann N Y Acad Sci*. doi:10.1111/nyas.14052
- 976 Horning DP, Joyce GF. 2016. Amplification of RNA by an RNA polymerase ribozyme. *Proc*  
977 *Natl Acad Sci U S A* **113**:9786–9791. doi:10.1073/pnas.1610103113
- 978 Houlihan G, Arangundy-Franklin S, Porebski BT, Subramanian N, Taylor AI, Holliger P.  
979 2020. Discovery and evolution of RNA and XNA reverse transcriptase function and  
980 fidelity. *Nat Chem* **12**:683–690. doi:10.1038/s41557-020-0502-8
- 981 Johnston WK, Unrau PJ, Lawrence MS, Glasner ME, Bartel DP. 2001. RNA-catalyzed RNA  
982 polymerization: Accurate and general RNA-templated primer extension. *Science (80-)*  
983 **292**:1319–1325. doi:10.1126/science.1060786
- 984 Kebbekus P, Draper DE, Hagerman P. 1995. Persistence Length of RNA. *Biochemistry*  
985 **34**:4354–4357. doi:10.1021/bi00013a026
- 986 Kim SC, Zhou L, Zhang W, O’Flaherty DK, Rondo-Brovetto V, Szostak JW. 2020. A Model  
987 for the Emergence of RNA from a Prebiotically Plausible Mixture of Ribonucleotides,  
988 Arabinonucleotides, and 2’-Deoxynucleotides. *J Am Chem Soc* **142**:2317–2326.  
989 doi:10.1021/jacs.9b11239
- 990 Klein DJ, Moore PB, Steitz TA. 2004. The contribution of metal ions to the structural stability  
991 of the large ribosomal subunit. *RNA* **10**:1366–1379. doi:10.1261/rna.7390804
- 992 Kristensen LS, Andersen MS, Stagsted LVW, Ebbesen KK, Hansen TB, Kjems J. 2019. The  
993 biogenesis, biology and characterization of circular RNAs. *Nat Rev Genet*.  
994 doi:10.1038/s41576-019-0158-7
- 995 Kristoffersen EL, Givskov A, Jørgensen LA, Jensen PW, W. Byl JA, Osheroff N, Andersen  
996 AH, Stougaard M, Ho Y-P, Knudsen BR. 2017. Interlinked DNA nano-circles for  
997 measuring topoisomerase II activity at the level of single decatenation events. *Nucleic*  
998 *Acids Res* **45**:7855–7869. doi:10.1093/nar/gkx480
- 999 Kuhn H, Demidov V V., Frank-Kamenetskii MD. 2002. Rolling-circle amplification under  
1000 topological constraints. *Nucleic Acids Res* **30**:574–580. doi:10.1093/nar/30.2.574
- 1001 Lasda E, Parker R. 2014. Circular RNAs: Diversity of form and function. *RNA*.  
1002 doi:10.1261/rna.047126.114
- 1003 Lavery R, Maddocks JH, Pasi M, Zakrzewska K. 2014. Analyzing ion distributions around  
1004 DNA. *Nucleic Acids Res* **42**:8138–8149. doi:10.1093/nar/gku504
- 1005 Lawrence MS, Bartel DP. 2003. Processivity of ribozyme-catalyzed RNA polymerization.  
1006 *Biochemistry* **42**:8748–8755. doi:10.1021/bi034228l
- 1007 Le Vay K, Mutschler H. 2019. The difficult case of an RNA-only origin of life. *Emerg Top Life*  
1008 *Sci*. doi:10.1042/ETLS20190024

- 1009 Litke JL, Jaffrey SR. 2019. Highly efficient expression of circular RNA aptamers in cells  
1010 using autocatalytic transcripts. *Nat Biotechnol* **37**:667–675. doi:10.1038/s41587-019-  
1011 0090-6
- 1012 Machado MR, Pantano S. 2020. Split the Charge Difference in Two! A Rule of Thumb for  
1013 Adding Proper Amounts of Ions in MD Simulations. *J Chem Theory Comput* **16**:1367–  
1014 1372. doi:10.1021/acs.jctc.9b00953
- 1015 Mohsen MG, Kool ET. 2016. The Discovery of Rolling Circle Amplification and Rolling Circle  
1016 Transcription. *Acc Chem Res* **49**:2540–2550. doi:10.1021/acs.accounts.6b00417
- 1017 Møller HD, Mohiyuddin M, Prada-Luengo I, Sailani MR, Halling JF, Plomgaard P, Maretty L,  
1018 Hansen AJ, Snyder MP, Pilegaard H, Lam HYK, Regenber B. 2018. Circular DNA  
1019 elements of chromosomal origin are common in healthy human somatic tissue. *Nat*  
1020 *Commun* **9**:1–12. doi:10.1038/s41467-018-03369-8
- 1021 Moss EL, Maghini DG, Bhatt AS. 2020. Complete, closed bacterial genomes from  
1022 microbiomes using nanopore sequencing. *Nat Biotechnol* **38**:701–707.  
1023 doi:10.1038/s41587-020-0422-6
- 1024 Mutschler H, Taylor AI, Porebski BT, Lightowlers A, Houlihan G, Abramov M, Herdewijn P,  
1025 Holliger P. 2018. Random-sequence genetic oligomer pools display an innate potential  
1026 for ligation and recombination. *Elife* **7**. doi:10.7554/eLife.43022
- 1027 Mutschler H, Wochner A, Holliger P. 2015. Freeze-thaw cycles as drivers of complex  
1028 ribozyme assembly. *Nat Chem* **7**:502–508. doi:10.1038/nchem.2251
- 1029 Nakano S, Proctor DJ, Bevilacqua PC. 2001. Mechanistic characterization of the HDV  
1030 genomic ribozyme: Assessing the catalytic and structural contributions of divalent metal  
1031 ions within a multichannel reaction mechanism. *Biochemistry* **40**:12022–12038.  
1032 doi:10.1021/bi011253n
- 1033 Nissen P, Hansen J, Ban N, Moore PB, Steitz TA. 2000. The structural basis of ribosome  
1034 activity in peptide bond synthesis. *Science (80- )* **289**:920–930.  
1035 doi:10.1126/science.289.5481.920
- 1036 Nohales M-A, Molina-Serrano D, Flores R, Daros J-A. 2012. Involvement of the  
1037 Chloroplastic Isoform of tRNA Ligase in the Replication of Viroids Belonging to the  
1038 Family Avsunviroidae. *J Virol* **86**:8269–8276. doi:10.1128/jvi.00629-12
- 1039 Noy A, Golestanian R. 2010. The Chirality of DNA: Elasticity Cross-Terms at Base-Pair  
1040 Level Including A-Tracts and the Influence of Ionic Strength. *J Phys Chem B* **114**:8022–  
1041 8031. doi:10.1021/jp104133j
- 1042 Patel BH, Percivalle C, Ritson DJ, Duffy CD, Sutherland JD. 2015. Common origins of RNA,  
1043 protein and lipid precursors in a cyanosulfidic protometabolism. *Nat Chem* **7**:301–307.  
1044 doi:10.1038/nchem.2202
- 1045 Pérez A, Marchán I, Svozil D, Sponer J, Cheatham TE, Laughton CA, Orozco M. 2007.

- 1046 Refinement of the AMBER force field for nucleic acids: Improving the description of  $\alpha/\gamma$   
1047 conformers. *Biophys J* **92**:3817–3829. doi:10.1529/biophysj.106.097782
- 1048 Petkovic S, Müller S. 2015. RNA circularization strategies in vivo and in vitro. *Nucleic Acids*  
1049 *Res* **43**:2454–2465. doi:10.1093/nar/gkv045
- 1050 Pettersen EF, Goddard TD, Huang CC, Couch GS, Greenblatt DM, Meng EC, Ferrin TE.  
1051 2004. UCSF Chimera - A visualization system for exploratory research and analysis. *J*  
1052 *Comput Chem* **25**:1605–1612. doi:10.1002/jcc.20084
- 1053 Powner MW, Gerland B, Sutherland JD. 2009. Synthesis of activated pyrimidine  
1054 ribonucleotides in prebiotically plausible conditions. *Nature* **459**:239–242.  
1055 doi:10.1038/nature08013
- 1056 Prywes N, Blain JC, Del Frate F, Szostak JW. 2016. Nonenzymatic copying of RNA  
1057 templates containing all four letters is catalyzed by activated oligonucleotides. *Elife* **5**.  
1058 doi:10.7554/eLife.17756
- 1059 Pyne ALB, Noy A, Main KHS, Velasco-Berrelleza V, Piperakis MM, Mitchenall LA,  
1060 Cugliandolo FM, Beton JG, Stevenson CEM, Hoogenboom BW, Bates AD, Maxwell A,  
1061 Harris SA. 2021. Base-pair resolution analysis of the effect of supercoiling on DNA  
1062 flexibility and major groove recognition by triplex-forming oligonucleotides. *Nat*  
1063 *Commun* **12**:1–12. doi:10.1038/s41467-021-21243-y
- 1064 Rajamani S, Vlassov A, Benner S, Coombs A, Olasagasti F, Deamer D. 2008. Lipid-assisted  
1065 synthesis of RNA-like polymers from mononucleotides. *Orig Life Evol Biosph* **38**:57–74.  
1066 doi:10.1007/s11084-007-9113-2
- 1067 Roe DR, Cheatham TE. 2013. PTRAJ and CPPTRAJ: Software for processing and analysis  
1068 of molecular dynamics trajectory data. *J Chem Theory Comput* **9**:3084–3095.  
1069 doi:10.1021/ct400341p
- 1070 Salditt A, Keil LMR, Horning DP, Mast CB, Joyce GF, Braun D. 2020. Thermal Habitat for  
1071 RNA Amplification and Accumulation. *Phys Rev Lett* **125**:048104.  
1072 doi:10.1103/PhysRevLett.125.048104
- 1073 Schürer H, Lang K, Schuster J, Mörl M. 2002. A universal method to produce in vitro  
1074 transcripts with homogeneous 3' ends. *Nucleic Acids Res* **30**. doi:10.1093/nar/gnf055
- 1075 Shechner DM, Grant RA, Bagby SC, Koldobskaya Y, Piccirilli JA, Bartel DP. 2009. Crystal  
1076 structure of the catalytic core of an RNA-Polymerase ribozyme. *Science (80- )*  
1077 **326**:1271–1275. doi:10.1126/science.1174676
- 1078 Shulman LM, Davidson I. 2017. Viruses with Circular Single-Stranded DNA Genomes Are  
1079 Everywhere! *Annu Rev Virol* **4**:159–180. doi:10.1146/annurev-virology-101416-041953
- 1080 Sponer J, Bussi G, Krepl M, Banas P, Bottaro S, Cunha RA, Gil-Ley A, Pinamonti G, Poblete  
1081 S, Jurečka P, Walter NG, Otyepka M. 2018. RNA structural dynamics as captured by  
1082 molecular simulations: A comprehensive overview. *Chem Rev*.

- 1083           doi:10.1021/acs.chemrev.7b00427
- 1084   Svozil D, Hobza P, Šponer J. 2010. Comparison of intrinsic stacking energies of ten unique  
1085           dinucleotide steps in A-RNA and B-DNA duplexes. Can we determine correct order of  
1086           stability by quantum-chemical calculations? *J Phys Chem B* **114**:1191–1203.  
1087           doi:10.1021/jp910788e
- 1088   Szostak JW. 2012. The eightfold path to non-enzymatic RNA replication. *J Syst Chem*.  
1089           doi:10.1186/1759-2208-3-2
- 1090   Tagami S, Attwater J, Holliger P. 2017. Simple peptides derived from the ribosomal core  
1091           potentiate RNA polymerase ribozyme function. *Nat Chem* **9**:325–332.  
1092           doi:10.1038/nchem.2739
- 1093   Tjhung KF, Shokhirev MN, Horning DP, Joyce GF. 2020. An RNA polymerase ribozyme that  
1094           synthesizes its own ancestor. *Proc Natl Acad Sci U S A* **117**:2906–2913.  
1095           doi:10.1073/pnas.1914282117
- 1096   Tupper AS, Higgs PG. 2021. Rolling-circle and strand-displacement mechanisms for non-  
1097           enzymatic RNA replication at the time of the origin of life. *J Theor Biol* **527**.  
1098           doi:10.1016/j.jtbi.2021.110822
- 1099   Velasco-Berrelleza V, Burman M, Shepherd JW, Leake MC, Golestanian R, Noy A. 2020.  
1100           SerraNA: A program to determine nucleic acids elasticity from simulation data. *Phys*  
1101           *Chem Chem Phys* **22**:19254–19266. doi:10.1039/d0cp02713h
- 1102   Wachowius F, Holliger P. 2019. Non-Enzymatic Assembly of a Minimized RNA Polymerase  
1103           Ribozyme. *ChemSystemsChem* **1**:12–15. doi:10.1002/syst.201900004
- 1104   Wawrzyniak P, Plucienniczak G, Bartosik D. 2017. The different faces of rolling-circle  
1105           replication and its multifunctional initiator proteins. *Front Microbiol*.  
1106           doi:10.3389/fmicb.2017.02353
- 1107   Wilkinson ME, Charenton C, Nagai K. 2020. RNA Splicing by the Spliceosome. *Annu Rev*  
1108           *Biochem*. doi:10.1146/annurev-biochem-091719-064225
- 1109   Wolters M, Wittig B. 1989. Construction of a 42 base pair double stranded DNA microcircle.  
1110           *Nucleic Acids Res* **17**:5163–72.
- 1111   Xu J, Chmela V, Green NJJ, Russell DAA, Janicki MJJ, Góra RWW, Szabla R, Bond ADD,  
1112           Sutherland JDD. 2020. Selective prebiotic formation of RNA pyrimidine and DNA purine  
1113           nucleosides. *Nature* **582**:60–66. doi:10.1038/s41586-020-2330-9
- 1114   Zgarbová M, Otyepka M, Šponer J, Mládek A, Banáš P, Cheatham TE, Jurečka P. 2011.  
1115           Refinement of the Cornell et al. Nucleic acids force field based on reference quantum  
1116           chemical calculations of glycosidic torsion profiles. *J Chem Theory Comput* **7**:2886–  
1117           2902. doi:10.1021/ct200162x
- 1118   Zhang SJ, Duzdevich D, Szostak JW. 2020. Potentially prebiotic activation chemistry  
1119           compatible with nonenzymatic RNA copying. *J Am Chem Soc* **142**:14810–14813.

- 1120           doi:10.1021/jacs.0c05300
- 1121   Zhou L, Ding D, Szostak JW. 2021. The virtual circular genome model for primordial RNA
- 1122           replication. *RNA* **27**:1–11. doi:10.1261/rna.077693.120
- 1123   Zhou L, O’Flaherty DK, Szostak JW. 2020. Template-Directed Copying of RNA by Non-
- 1124           enzymatic Ligation. *Angew Chemie - Int Ed* **59**:15682–15687.
- 1125           doi:10.1002/anie.202004934
- 1126





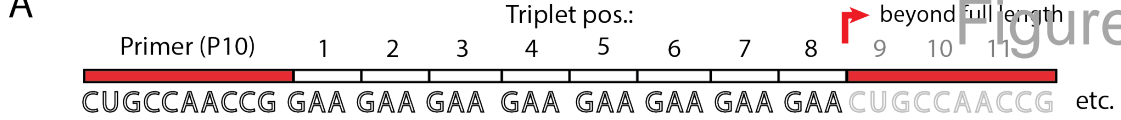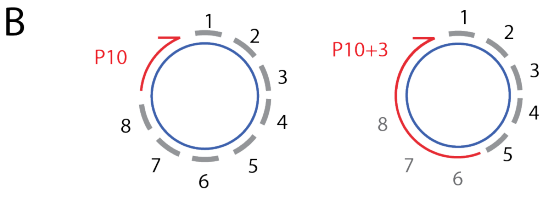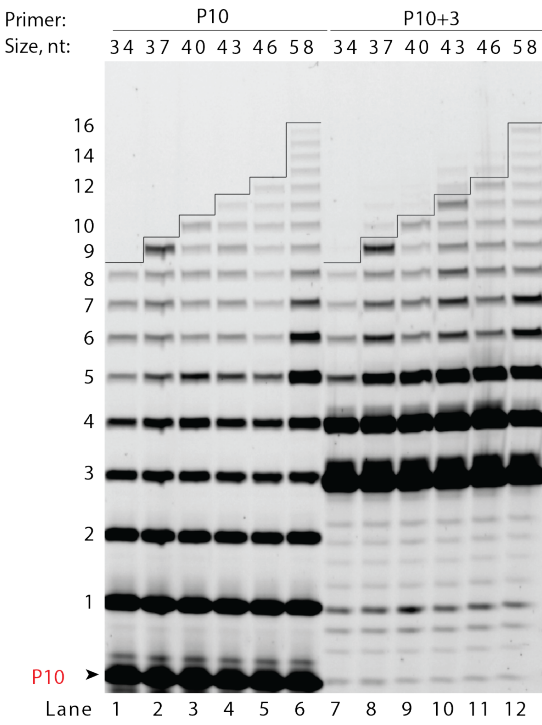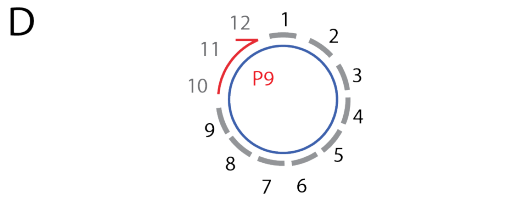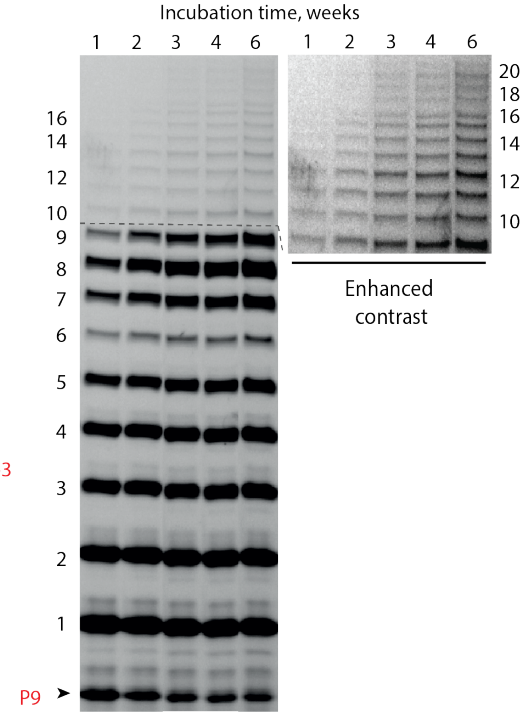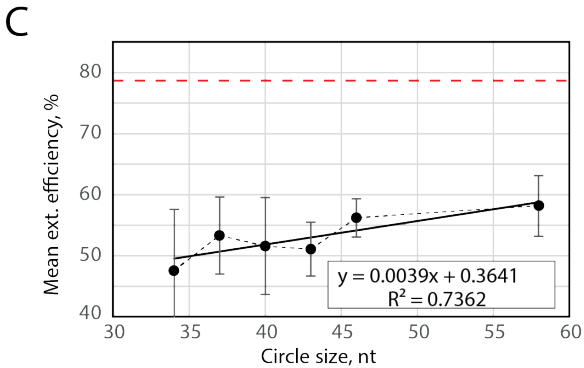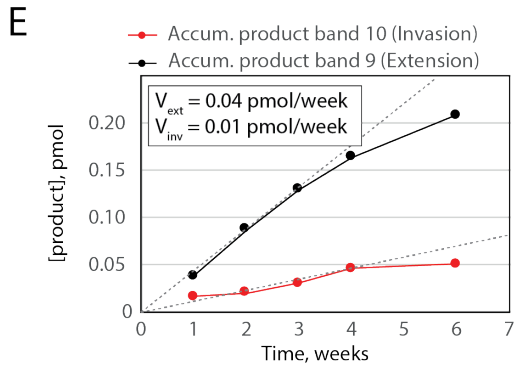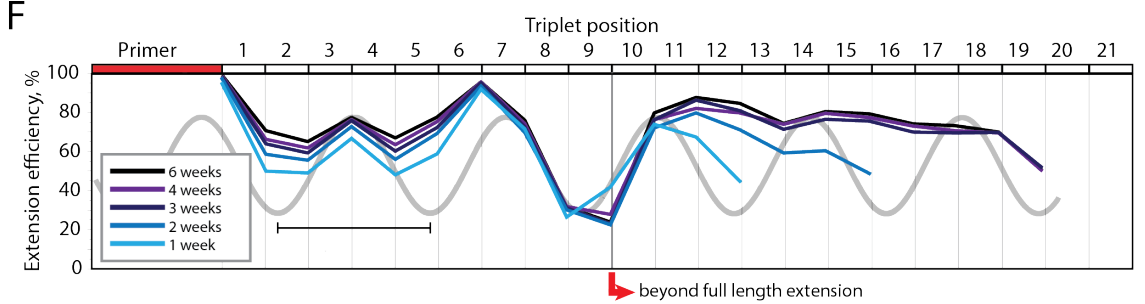

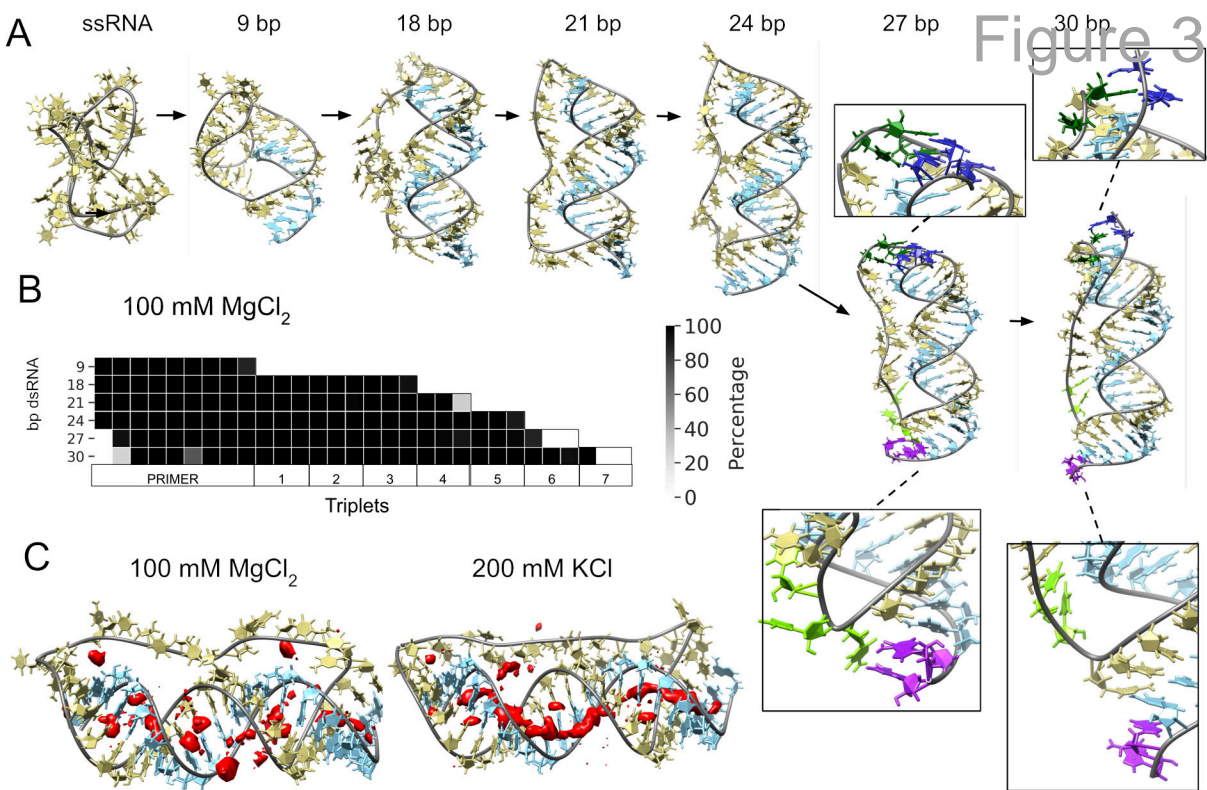

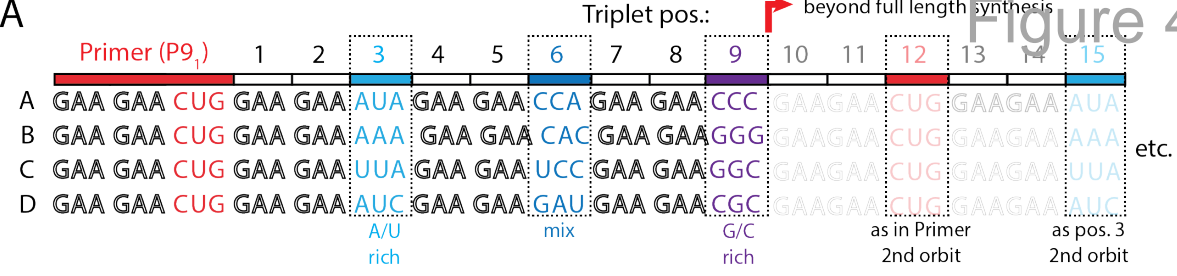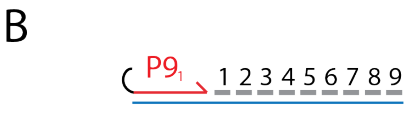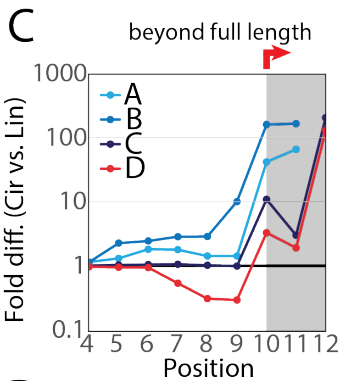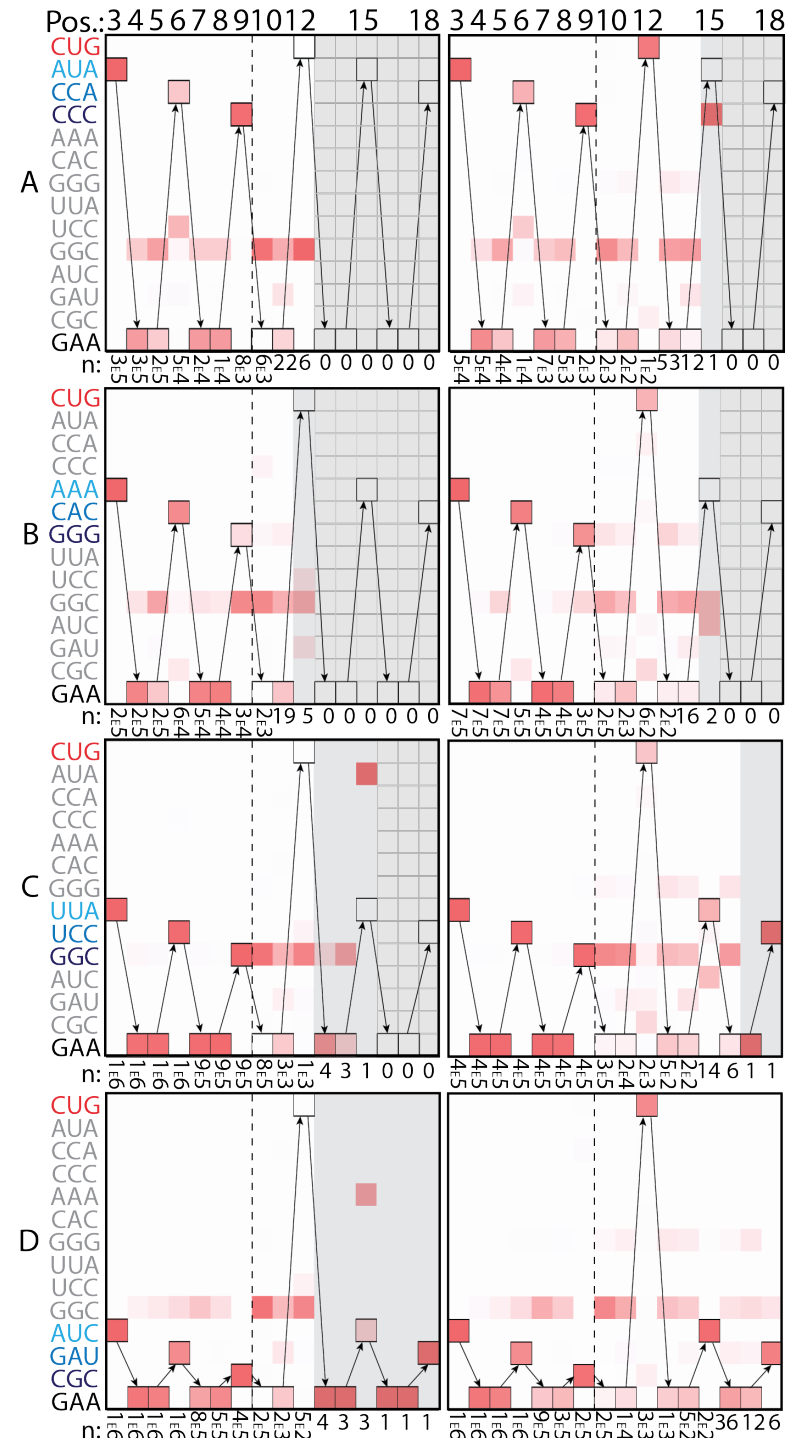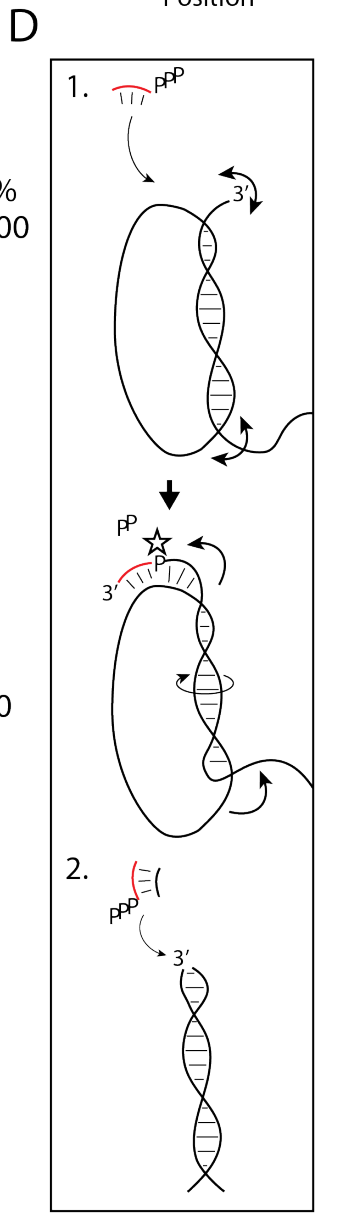

A

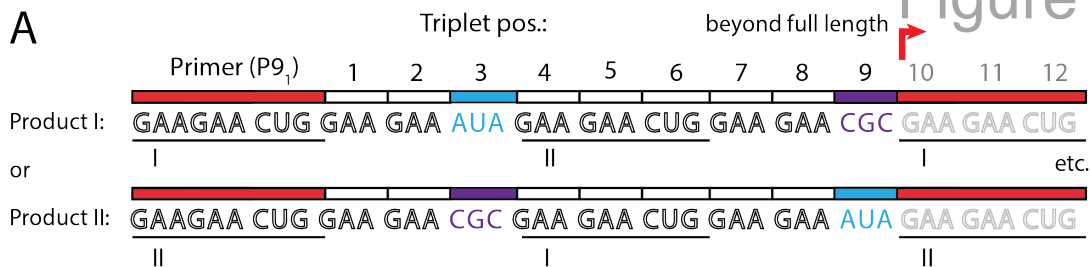

B

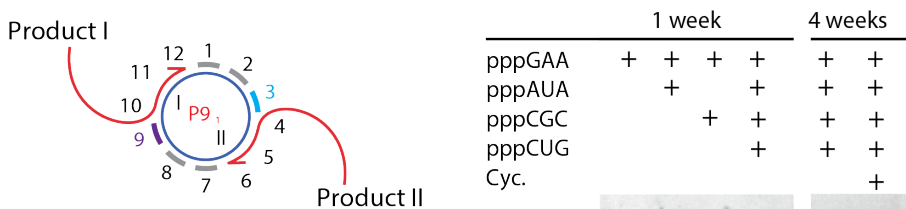

C

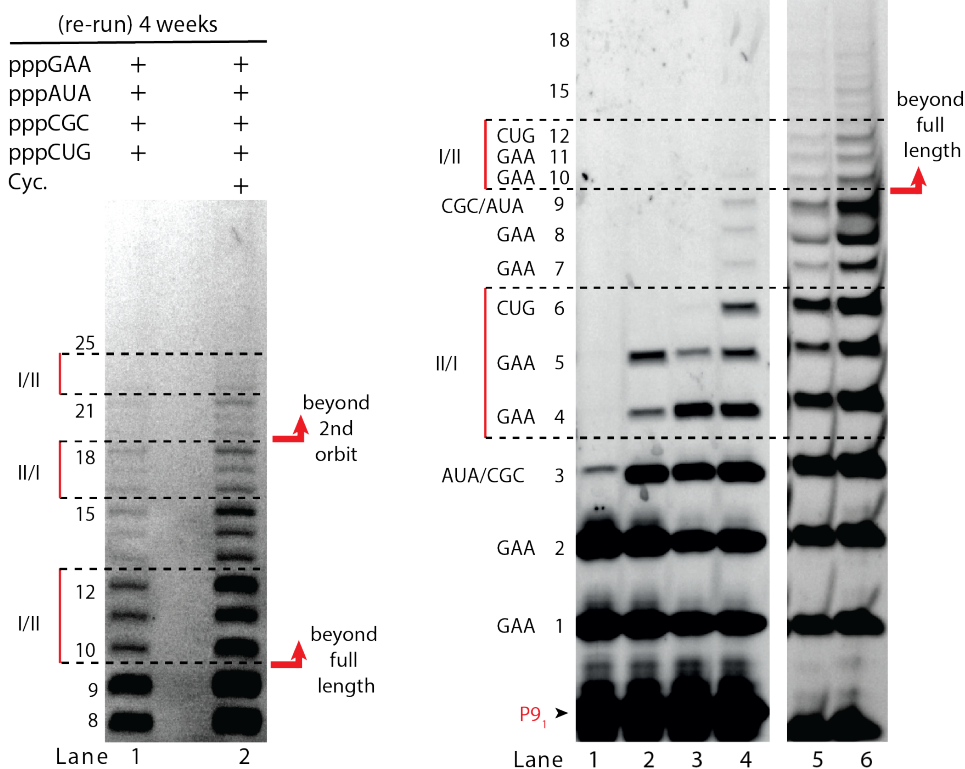

D

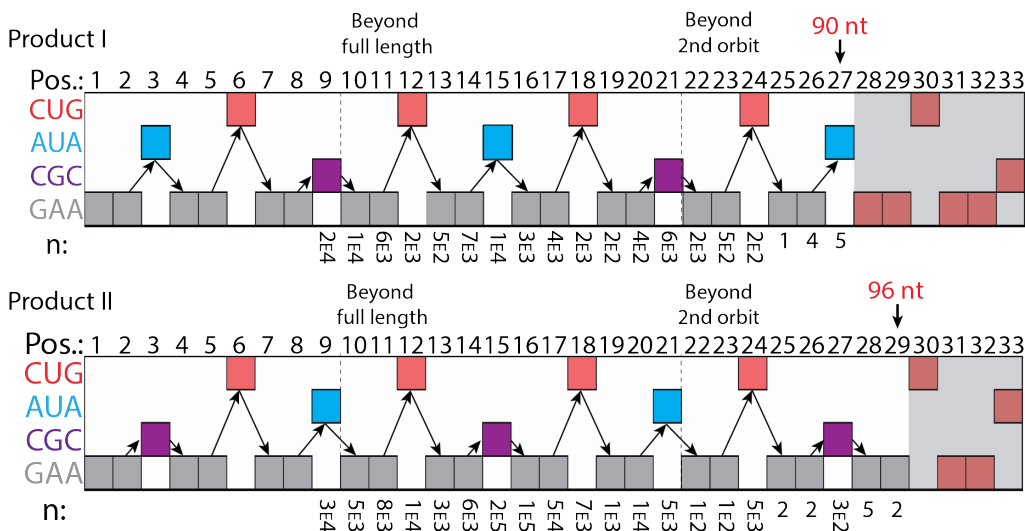



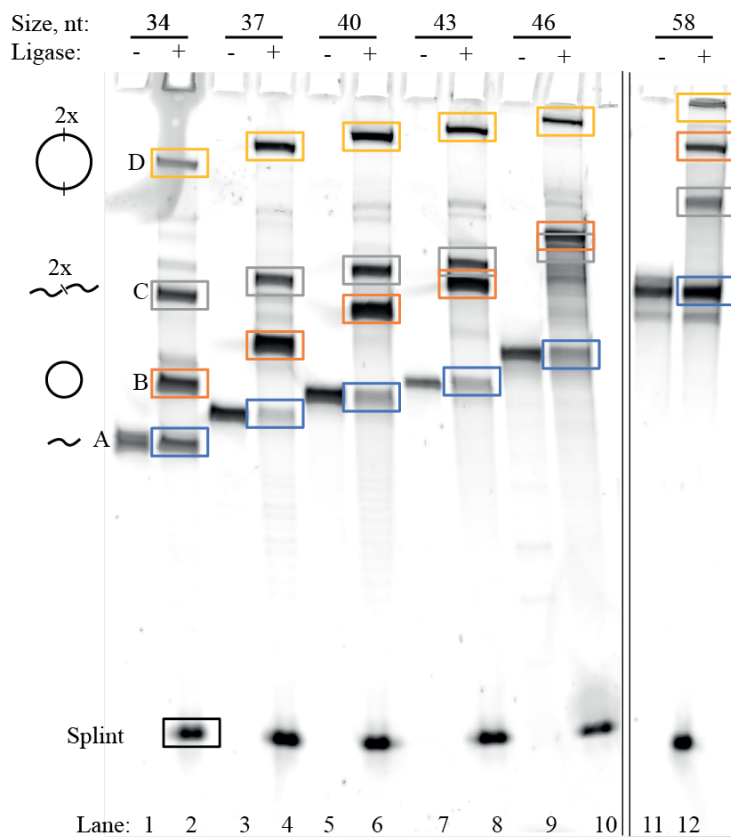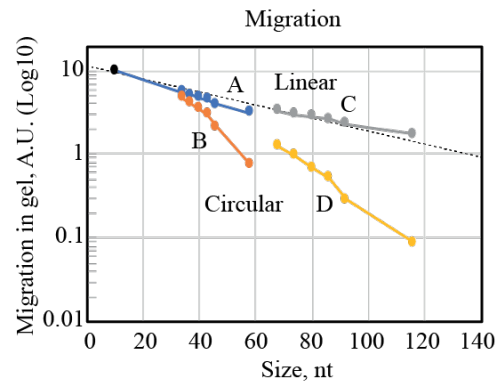

A

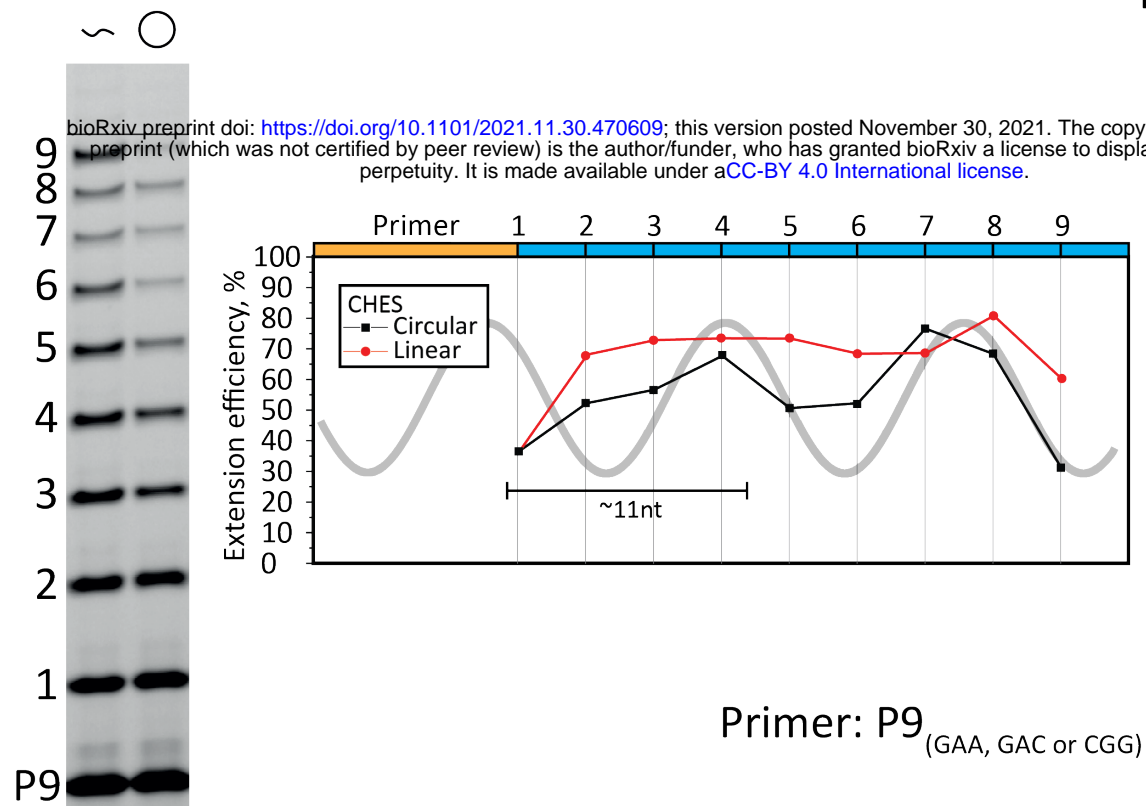

B

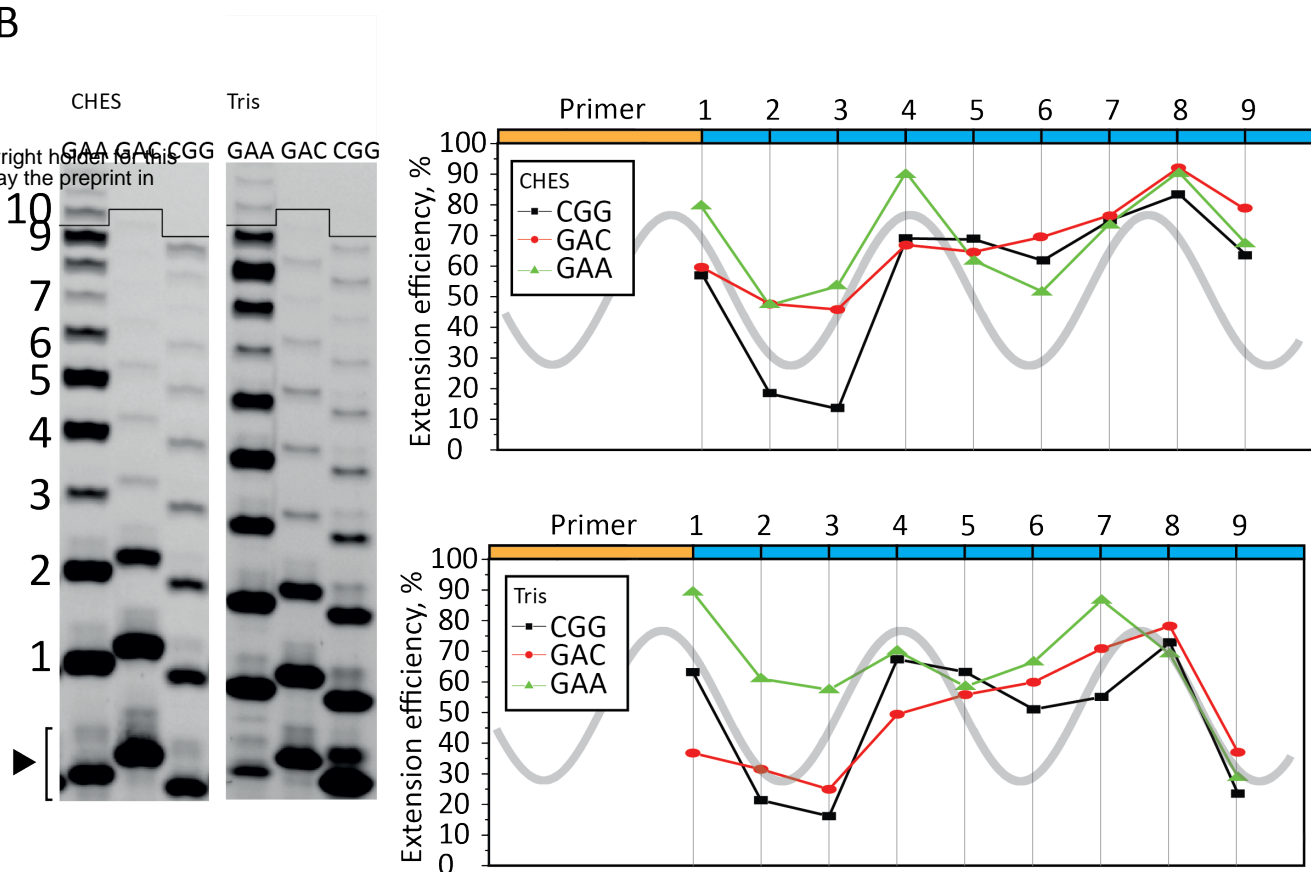

C

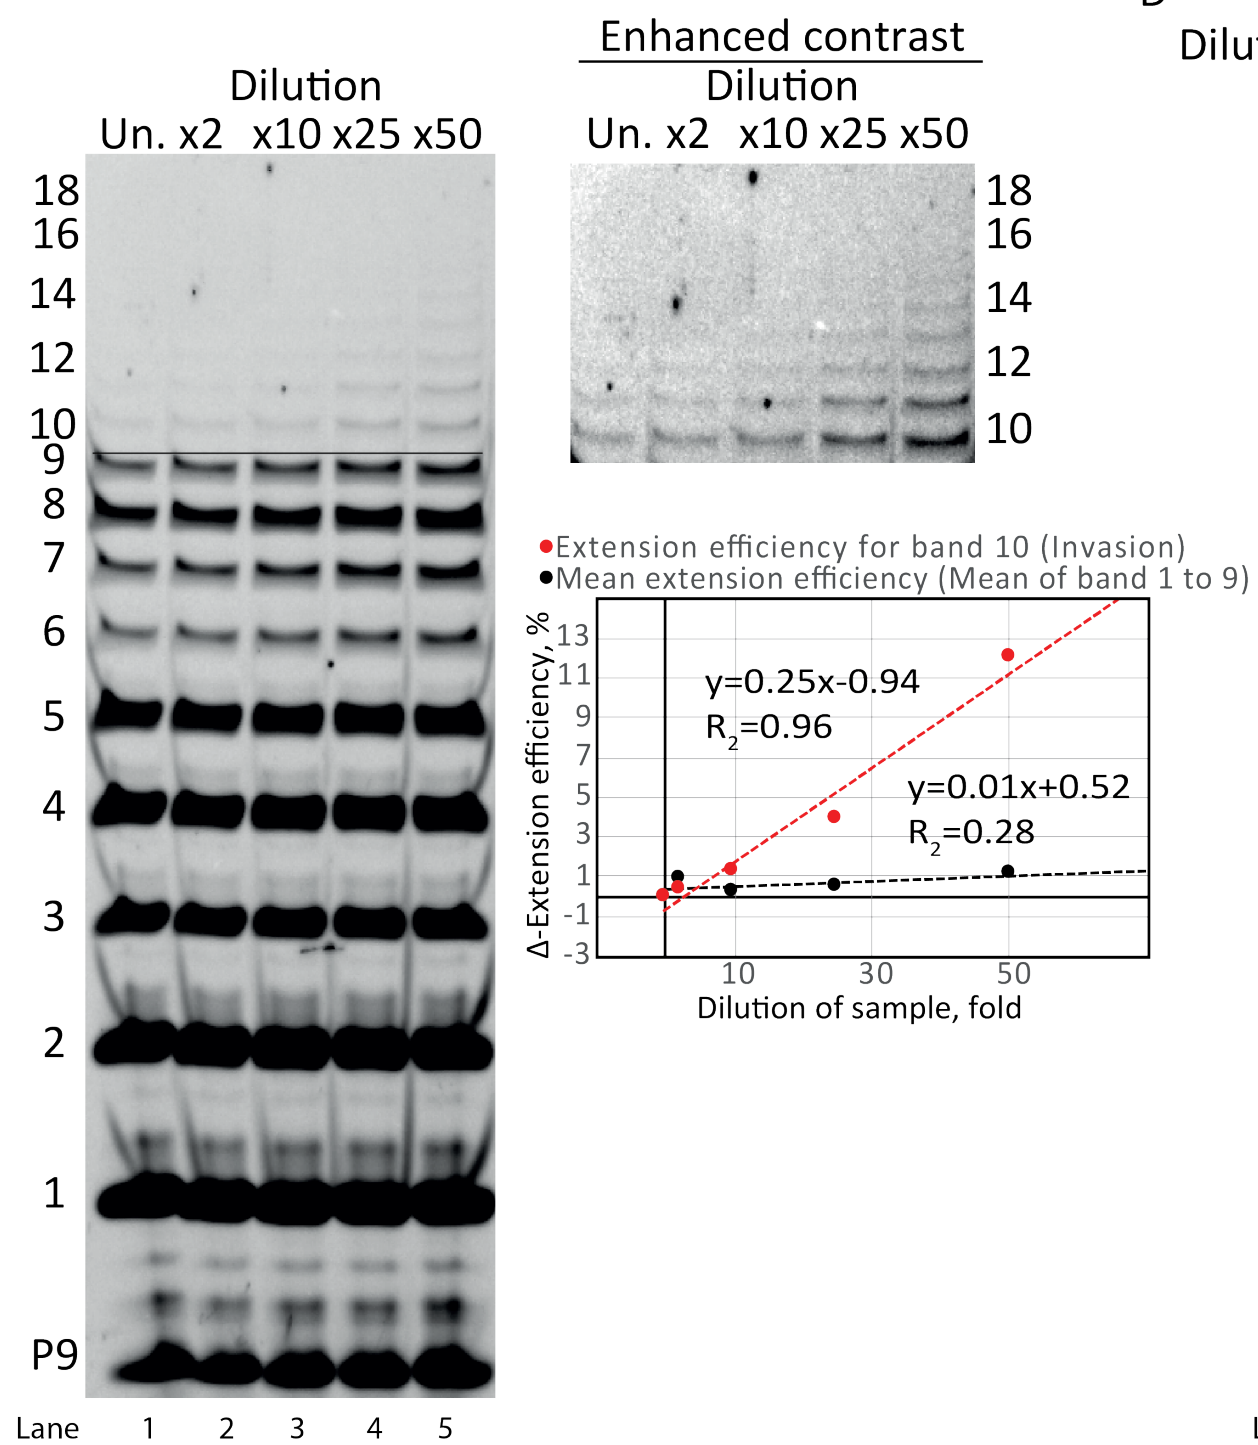

D

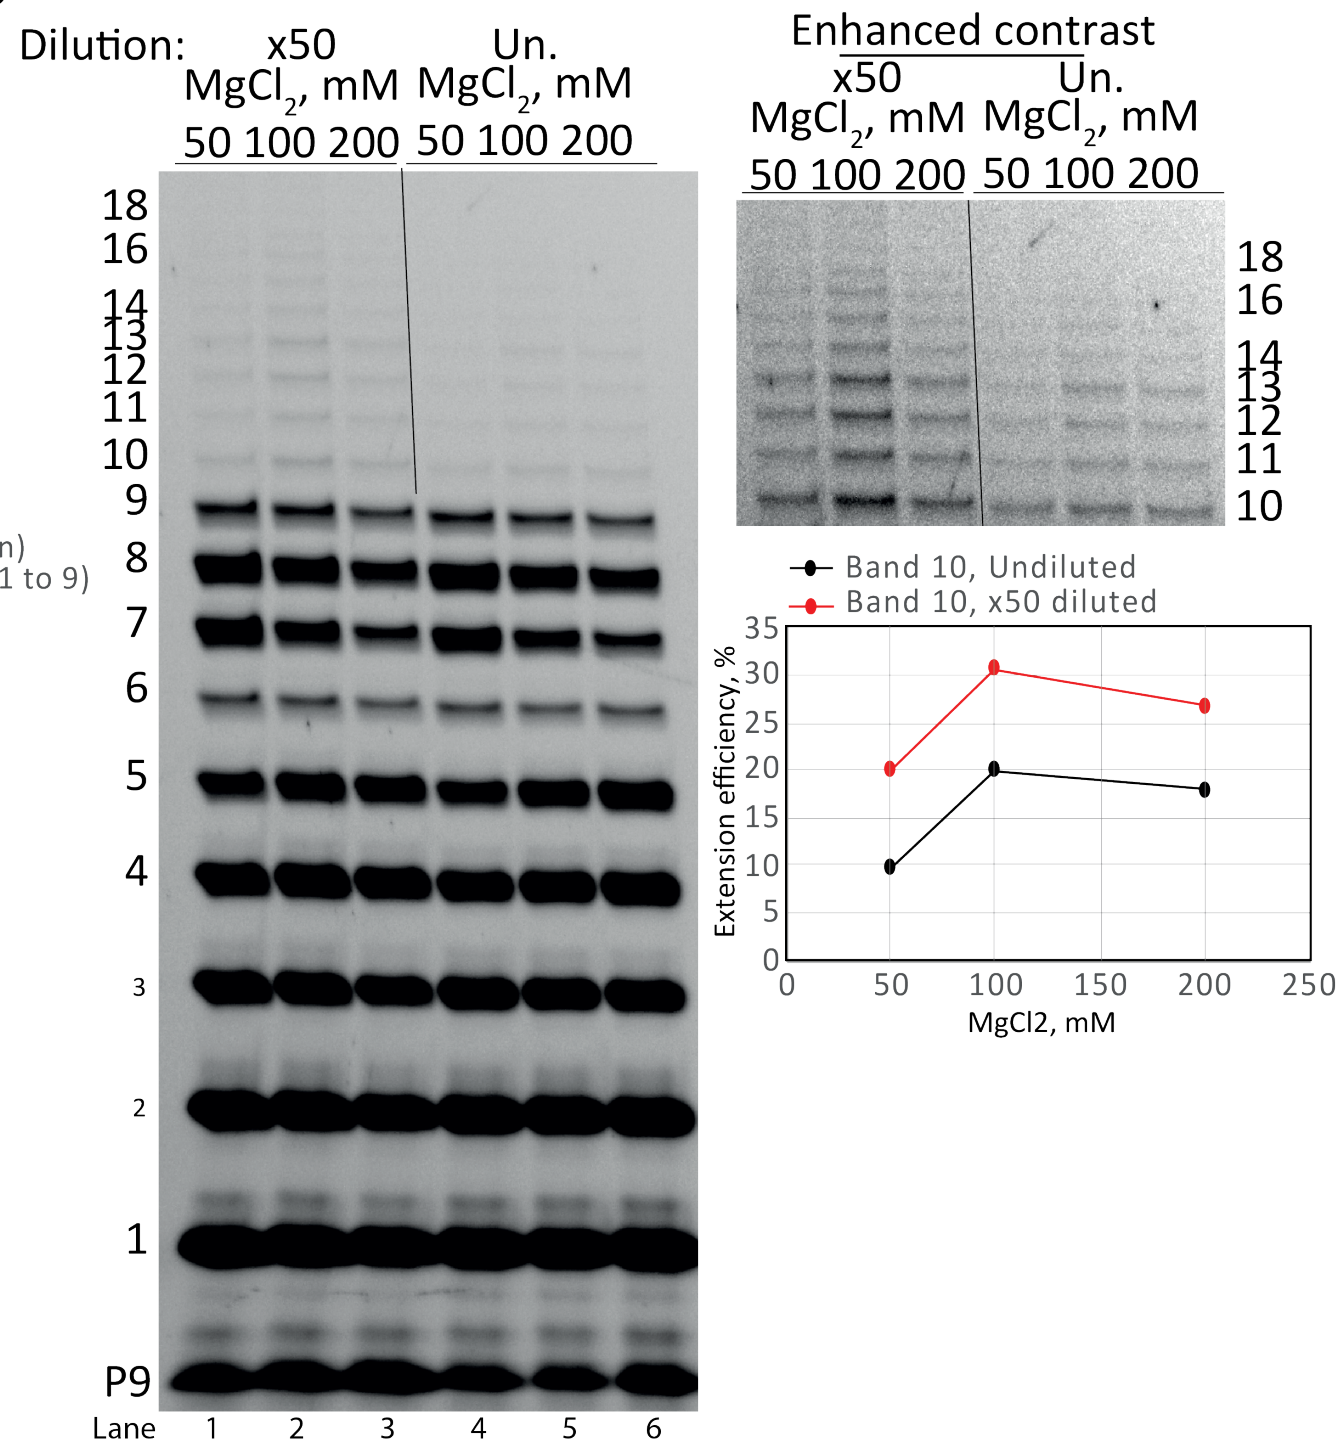

## A) Linear RNA

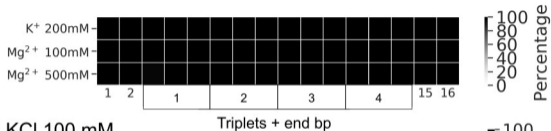

## B) KCl 100 mM

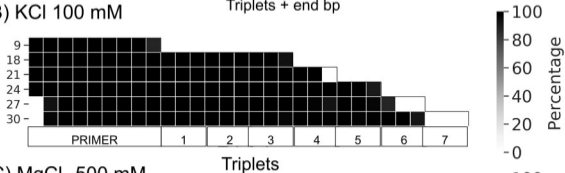

## C) $MgCl_2$ 500 mM

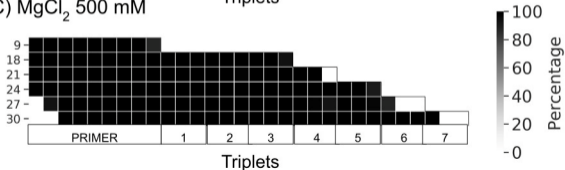



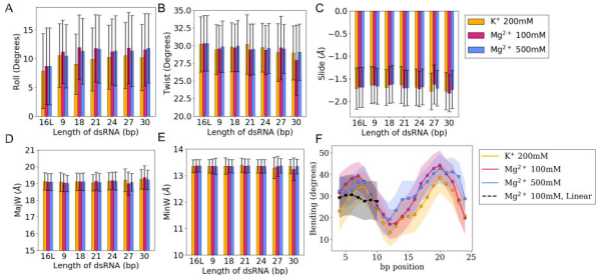

## 200 mM KCl

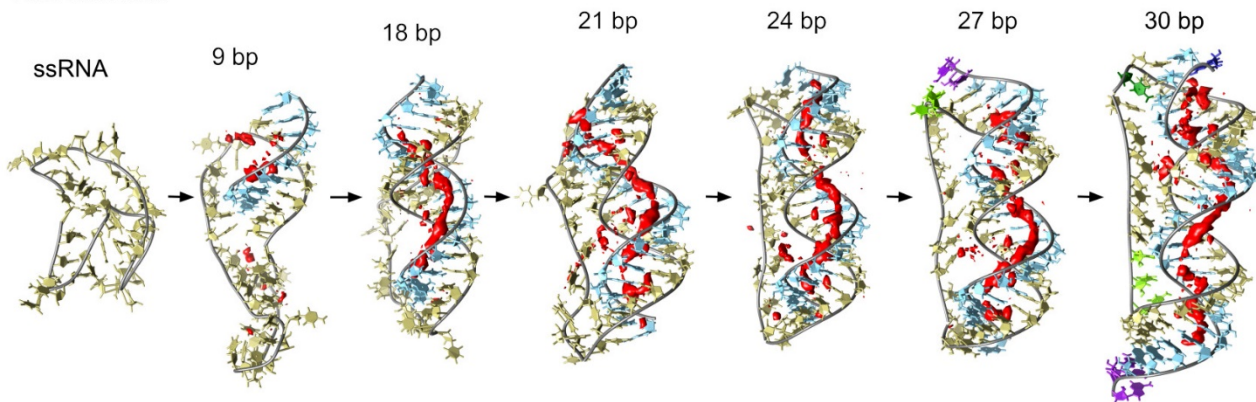

## 100 mM MgCl<sub>2</sub>

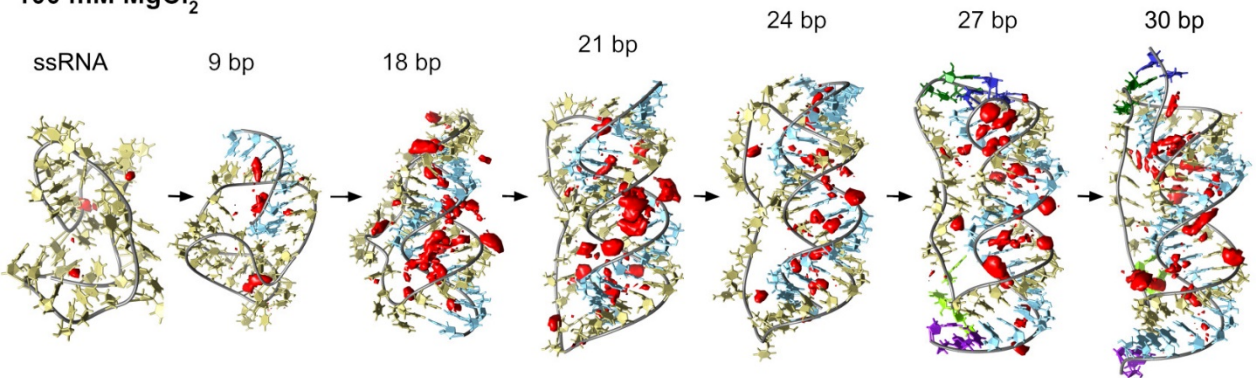

## 500 mM MgCl<sub>2</sub>

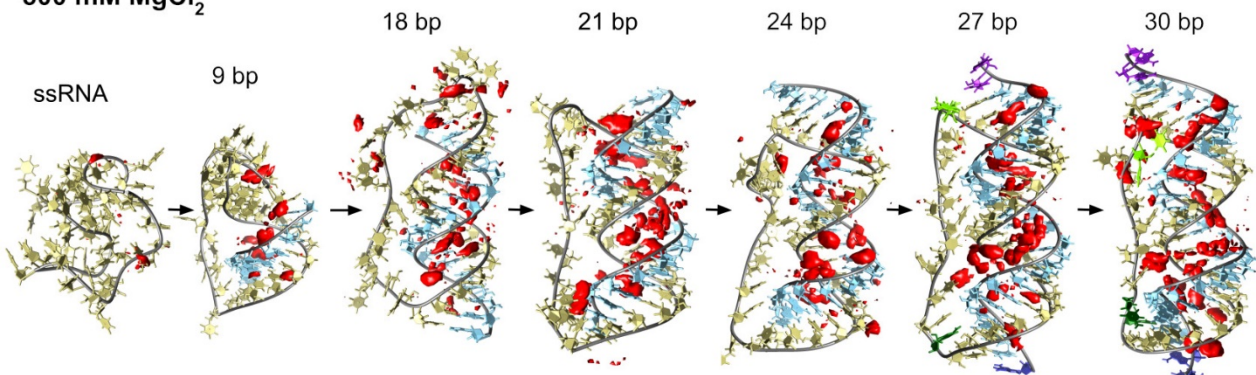

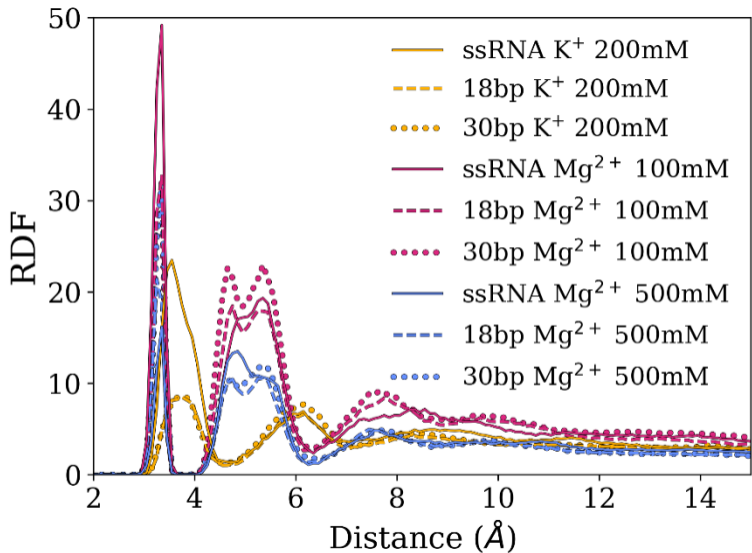

A

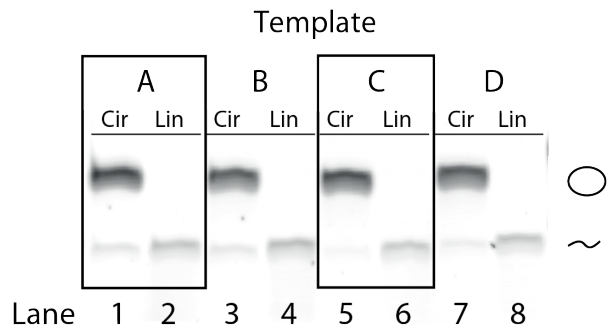

B

Gel electroporation of  
One-pot extension of A-D

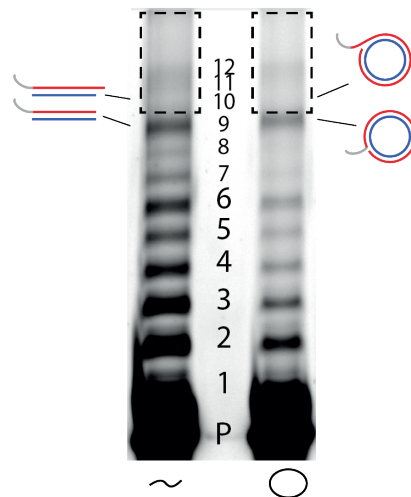

C

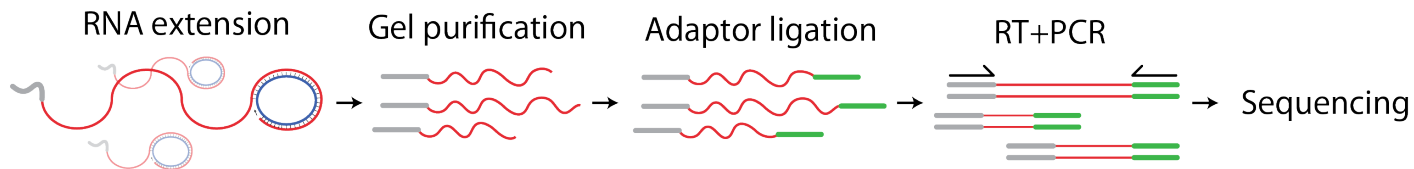

A

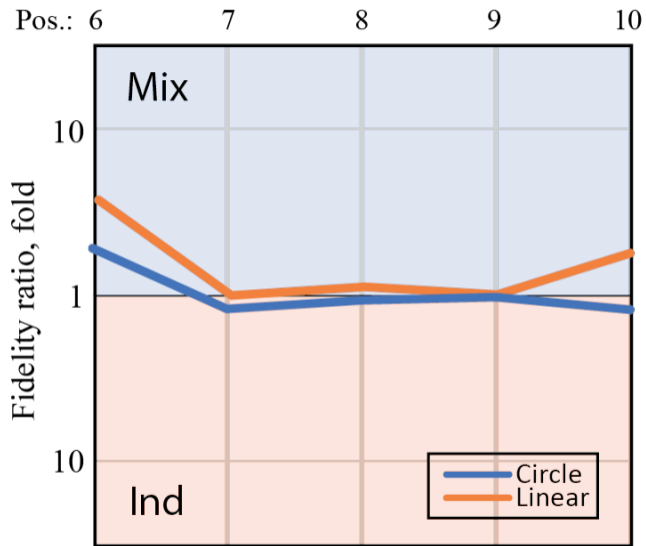

B

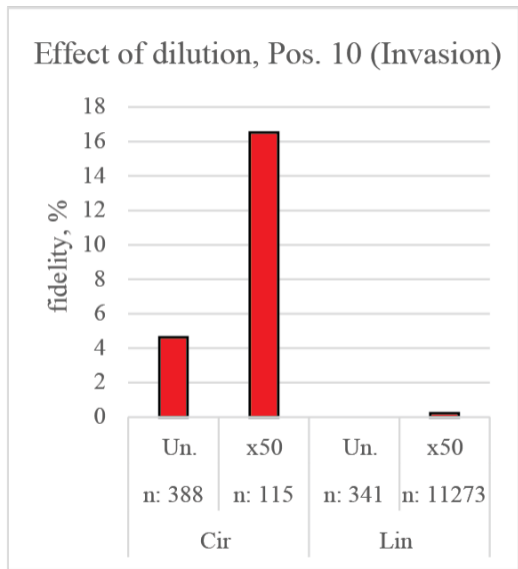

8211

Enhanced contrast

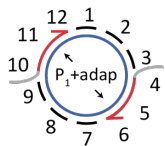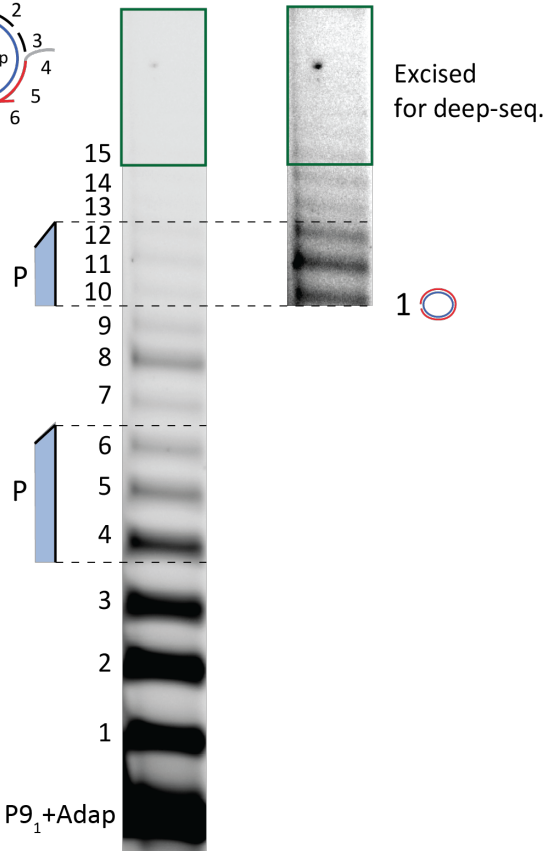

**A**

# Kinetics of micro HHz

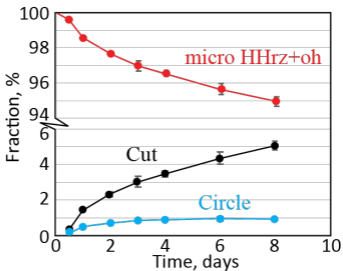**B**

# Fraction of circle

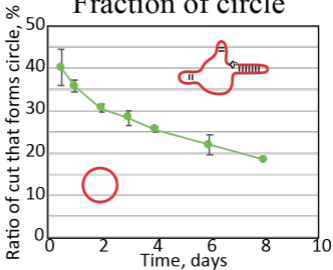

Source: http://biorxiv.org/content/10.1101/2021.11.30.470609v1.full.pdf
